# Supplementary material for: Predicting Emotional States Using Behavioral Markers Derived From Passively Sensed Data: Data-Driven Machine Learning Approach
Source: PubMed Central journal article supplement (PMC8088855; doi:10.2196/24465), 2021-03-22
Supplement: mhealth_v9i3e24465_app2.pdf [file mhealth_v9i3e24465_app2.pdf]

## Multimedia Appendix 2

Model notations: LR/SVC/RFC/MLP -  $x$  = LR/SVC/RFC/MLP classifiers trained with input features formed of  $x$ -days of observations concatenated to create a single feature vector. RNN/LSTM/GRU -  $x$  = RNN/LSTM/GRU - RNNs with different cells using  $x$ -months long input sequences. Input feature notations: w/o posteriors = raw features used as classifier input; only posteriors = the MM component posterior probabilities used as classifier input features; w/ posteriors = raw features concatenated with the MM component posterior probabilities used as classifier input features. Model abbreviations: LR = logistic regression, SVC = support vector classifier, RFC = random forest classifier, MLP = multilayer perceptron, RNN = recurrent neural network, LSTM = long short term memory, GRU = gated recurrent unit.

**Figure S1 - Classifier performance comparison plot - Emotional valence case.**

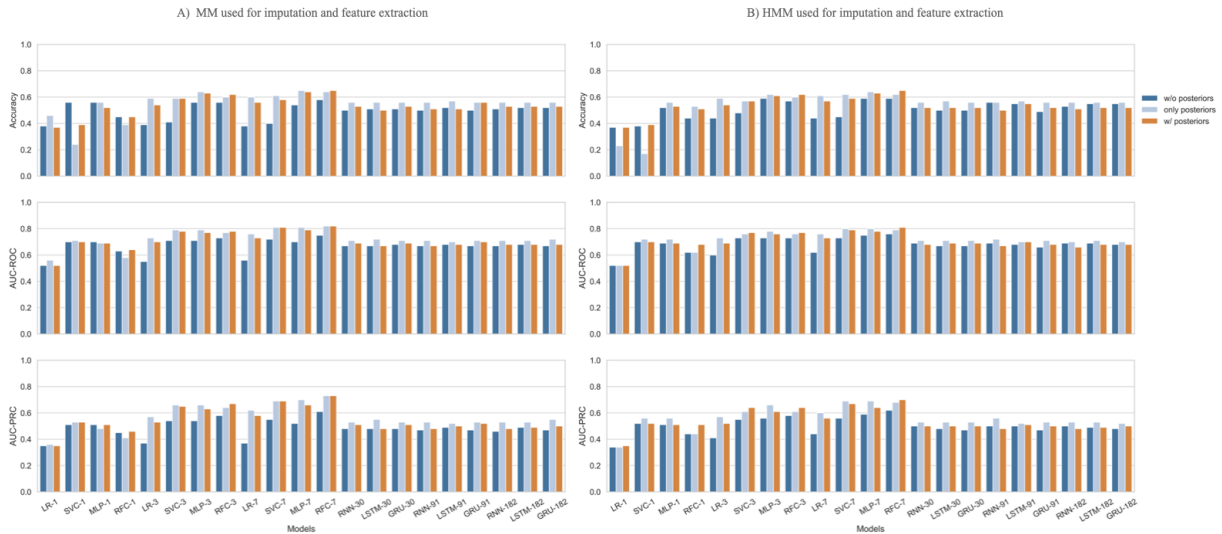

**Table S1 - Classifier performance overview - Emotional valence case.**

Class labels: 0 = negative, 1 = neutral, 2 = positive emotional valence.

| Model           | Input Features | Accuracy | AUC-ROC | AUC-PRC                                                                                                                                                                                                                                               | Confusion Matrix                                                                                                                                                                                                                                     |   |   |   |   |      |     |     |     |     |     |     |     |     |     |     |     |
|-----------------|----------------|----------|---------|-------------------------------------------------------------------------------------------------------------------------------------------------------------------------------------------------------------------------------------------------------|------------------------------------------------------------------------------------------------------------------------------------------------------------------------------------------------------------------------------------------------------|---|---|---|---|------|-----|-----|-----|-----|-----|-----|-----|-----|-----|-----|-----|
| LR-1            | w/o posteriors | 0.38     | 0.52    | 0.35                                                                                                                                                                                                                                                  | <table border="1"> <tr><td></td><td>0</td><td>1</td><td>2</td></tr> <tr><td>0</td><td>690</td><td>596</td><td>557</td></tr> <tr><td>1</td><td>201</td><td>177</td><td>176</td></tr> <tr><td>2</td><td>340</td><td>176</td><td>367</td></tr> </table> |   | 0 | 1 | 2 | 0    | 690 | 596 | 557 | 1   | 201 | 177 | 176 | 2   | 340 | 176 | 367 |
|                 |                | 0        | 1       | 2                                                                                                                                                                                                                                                     |                                                                                                                                                                                                                                                      |   |   |   |   |      |     |     |     |     |     |     |     |     |     |     |     |
|                 | 0              | 690      | 596     | 557                                                                                                                                                                                                                                                   |                                                                                                                                                                                                                                                      |   |   |   |   |      |     |     |     |     |     |     |     |     |     |     |     |
| 1               | 201            | 177      | 176     |                                                                                                                                                                                                                                                       |                                                                                                                                                                                                                                                      |   |   |   |   |      |     |     |     |     |     |     |     |     |     |     |     |
| 2               | 340            | 176      | 367     |                                                                                                                                                                                                                                                       |                                                                                                                                                                                                                                                      |   |   |   |   |      |     |     |     |     |     |     |     |     |     |     |     |
| w/ posteriors   | 0.37           | 0.52     | 0.35    | <table border="1"> <tr><td></td><td>0</td><td>1</td><td>2</td></tr> <tr><td>0</td><td>692</td><td>597</td><td>554</td></tr> <tr><td>1</td><td>201</td><td>175</td><td>178</td></tr> <tr><td>2</td><td>338</td><td>185</td><td>360</td></tr> </table>  |                                                                                                                                                                                                                                                      | 0 | 1 | 2 | 0 | 692  | 597 | 554 | 1   | 201 | 175 | 178 | 2   | 338 | 185 | 360 |     |
|                 | 0              | 1        | 2       |                                                                                                                                                                                                                                                       |                                                                                                                                                                                                                                                      |   |   |   |   |      |     |     |     |     |     |     |     |     |     |     |     |
| 0               | 692            | 597      | 554     |                                                                                                                                                                                                                                                       |                                                                                                                                                                                                                                                      |   |   |   |   |      |     |     |     |     |     |     |     |     |     |     |     |
| 1               | 201            | 175      | 178     |                                                                                                                                                                                                                                                       |                                                                                                                                                                                                                                                      |   |   |   |   |      |     |     |     |     |     |     |     |     |     |     |     |
| 2               | 338            | 185      | 360     |                                                                                                                                                                                                                                                       |                                                                                                                                                                                                                                                      |   |   |   |   |      |     |     |     |     |     |     |     |     |     |     |     |
| only posteriors | 0.46           | 0.56     | 0.36    | <table border="1"> <tr><td></td><td>0</td><td>1</td><td>2</td></tr> <tr><td>0</td><td>1038</td><td>0</td><td>805</td></tr> <tr><td>1</td><td>296</td><td>0</td><td>258</td></tr> <tr><td>2</td><td>406</td><td>0</td><td>477</td></tr> </table>       |                                                                                                                                                                                                                                                      | 0 | 1 | 2 | 0 | 1038 | 0   | 805 | 1   | 296 | 0   | 258 | 2   | 406 | 0   | 477 |     |
|                 | 0              | 1        | 2       |                                                                                                                                                                                                                                                       |                                                                                                                                                                                                                                                      |   |   |   |   |      |     |     |     |     |     |     |     |     |     |     |     |
| 0               | 1038           | 0        | 805     |                                                                                                                                                                                                                                                       |                                                                                                                                                                                                                                                      |   |   |   |   |      |     |     |     |     |     |     |     |     |     |     |     |
| 1               | 296            | 0        | 258     |                                                                                                                                                                                                                                                       |                                                                                                                                                                                                                                                      |   |   |   |   |      |     |     |     |     |     |     |     |     |     |     |     |
| 2               | 406            | 0        | 477     |                                                                                                                                                                                                                                                       |                                                                                                                                                                                                                                                      |   |   |   |   |      |     |     |     |     |     |     |     |     |     |     |     |
| LR-3            | w/o posteriors | 0.39     | 0.55    | 0.37                                                                                                                                                                                                                                                  | <table border="1"> <tr><td></td><td>0</td><td>1</td><td>2</td></tr> <tr><td>0</td><td>622</td><td>687</td><td>500</td></tr> <tr><td>1</td><td>188</td><td>170</td><td>175</td></tr> <tr><td>2</td><td>238</td><td>170</td><td>450</td></tr> </table> |   | 0 | 1 | 2 | 0    | 622 | 687 | 500 | 1   | 188 | 170 | 175 | 2   | 238 | 170 | 450 |
|                 |                | 0        | 1       | 2                                                                                                                                                                                                                                                     |                                                                                                                                                                                                                                                      |   |   |   |   |      |     |     |     |     |     |     |     |     |     |     |     |
| 0               | 622            | 687      | 500     |                                                                                                                                                                                                                                                       |                                                                                                                                                                                                                                                      |   |   |   |   |      |     |     |     |     |     |     |     |     |     |     |     |
| 1               | 188            | 170      | 175     |                                                                                                                                                                                                                                                       |                                                                                                                                                                                                                                                      |   |   |   |   |      |     |     |     |     |     |     |     |     |     |     |     |
| 2               | 238            | 170      | 450     |                                                                                                                                                                                                                                                       |                                                                                                                                                                                                                                                      |   |   |   |   |      |     |     |     |     |     |     |     |     |     |     |     |
| w/ posteriors   | 0.54           | 0.7      | 0.53    | <table border="1"> <tr><td></td><td>0</td><td>1</td><td>2</td></tr> <tr><td>0</td><td>1050</td><td>467</td><td>292</td></tr> <tr><td>1</td><td>173</td><td>196</td><td>164</td></tr> <tr><td>2</td><td>197</td><td>181</td><td>480</td></tr> </table> |                                                                                                                                                                                                                                                      | 0 | 1 | 2 | 0 | 1050 | 467 | 292 | 1   | 173 | 196 | 164 | 2   | 197 | 181 | 480 |     |
|                 | 0              | 1        | 2       |                                                                                                                                                                                                                                                       |                                                                                                                                                                                                                                                      |   |   |   |   |      |     |     |     |     |     |     |     |     |     |     |     |
| 0               | 1050           | 467      | 292     |                                                                                                                                                                                                                                                       |                                                                                                                                                                                                                                                      |   |   |   |   |      |     |     |     |     |     |     |     |     |     |     |     |
| 1               | 173            | 196      | 164     |                                                                                                                                                                                                                                                       |                                                                                                                                                                                                                                                      |   |   |   |   |      |     |     |     |     |     |     |     |     |     |     |     |
| 2               | 197            | 181      | 480     |                                                                                                                                                                                                                                                       |                                                                                                                                                                                                                                                      |   |   |   |   |      |     |     |     |     |     |     |     |     |     |     |     |

**Table S1 continued from previous page**

| Model           | Input Features  | Accuracy | AUC-ROC | AUC-PRC | Confusion Matrix |      |     |     |
|-----------------|-----------------|----------|---------|---------|------------------|------|-----|-----|
| LR-7            | only posteriors | 0.59     | 0.73    | 0.57    | 0                | 0    | 1   | 2   |
|                 |                 |          |         |         | 1                | 1235 | 297 | 277 |
|                 |                 |          |         |         | 2                | 213  | 147 | 173 |
|                 | w/o posteriors  | 0.38     | 0.56    | 0.37    | 0                | 0    | 1   | 2   |
|                 |                 |          |         |         | 1                | 592  | 699 | 458 |
|                 |                 |          |         |         | 2                | 185  | 149 | 168 |
|                 | w/ posteriors   | 0.56     | 0.73    | 0.58    | 0                | 0    | 1   | 2   |
|                 |                 |          |         |         | 1                | 1074 | 403 | 272 |
|                 |                 |          |         |         | 2                | 158  | 193 | 151 |
| MLP-1           | only posteriors | 0.6      | 0.76    | 0.62    | 0                | 0    | 1   | 2   |
|                 |                 |          |         |         | 1                | 1226 | 275 | 248 |
|                 |                 |          |         |         | 2                | 192  | 159 | 151 |
|                 | w/o posteriors  | 0.56     | 0.7     | 0.51    | 0                | 0    | 1   | 2   |
|                 |                 |          |         |         | 1                | 1837 | 4   | 2   |
|                 |                 |          |         |         | 2                | 554  | 0   | 0   |
|                 | w/ posteriors   | 0.52     | 0.69    | 0.51    | 0                | 0    | 1   | 2   |
|                 |                 |          |         |         | 1                | 878  | 2   | 3   |
|                 |                 |          |         |         | 2                | 1572 | 110 | 161 |
| MLP-3           | only posteriors | 0.56     | 0.69    | 0.48    | 0                | 0    | 1   | 2   |
|                 |                 |          |         |         | 1                | 1843 | 0   | 0   |
|                 |                 |          |         |         | 2                | 554  | 0   | 0   |
|                 | w/o posteriors  | 0.56     | 0.71    | 0.54    | 0                | 0    | 1   | 2   |
|                 |                 |          |         |         | 1                | 1474 | 188 | 147 |
|                 |                 |          |         |         | 2                | 414  | 43  | 76  |
|                 | w/ posteriors   | 0.63     | 0.77    | 0.63    | 0                | 0    | 1   | 2   |
|                 |                 |          |         |         | 1                | 557  | 38  | 263 |
|                 |                 |          |         |         | 2                | 1515 | 102 | 192 |
| MLP-7           | only posteriors | 0.64     | 0.79    | 0.66    | 0                | 0    | 1   | 2   |
|                 |                 |          |         |         | 1                | 1595 | 33  | 181 |
|                 |                 |          |         |         | 2                | 358  | 44  | 131 |
|                 | w/o posteriors  | 0.54     | 0.7     | 0.52    | 0                | 0    | 1   | 2   |
|                 |                 |          |         |         | 1                | 1418 | 97  | 234 |
|                 |                 |          |         |         | 2                | 397  | 27  | 78  |
|                 | w/ posteriors   | 0.64     | 0.79    | 0.66    | 0                | 0    | 1   | 2   |
|                 |                 |          |         |         | 1                | 564  | 35  | 219 |
|                 |                 |          |         |         | 2                | 1474 | 96  | 179 |
| only posteriors | 0.65            | 0.81     | 0.7     | 0       | 0                | 1    | 2   |     |
|                 |                 |          |         | 1       | 1533             | 51   | 165 |     |
|                 |                 |          |         | 2       | 307              | 66   | 129 |     |
|                 |                 |          |         |         | 0                | 1    | 2   |     |
|                 |                 |          |         |         | 1                | 1474 | 96  | 179 |
|                 |                 |          |         |         | 2                | 310  | 88  | 104 |
|                 |                 |          |         |         |                  | 0    | 1   | 2   |
|                 |                 |          |         |         | 0                | 1533 | 51  | 165 |
|                 |                 |          |         |         | 1                | 307  | 66  | 129 |
|                 |                 |          |         |         | 2                | 368  | 45  | 405 |

**Table S1 continued from previous page**

| Model           | Input Features | Accuracy | AUC-ROC | AUC-PRC                                                                                                                                                                                                                                               | Confusion Matrix                                                                                                                                                                                                                                     |   |   |   |   |      |      |     |     |     |     |     |     |     |     |     |     |
|-----------------|----------------|----------|---------|-------------------------------------------------------------------------------------------------------------------------------------------------------------------------------------------------------------------------------------------------------|------------------------------------------------------------------------------------------------------------------------------------------------------------------------------------------------------------------------------------------------------|---|---|---|---|------|------|-----|-----|-----|-----|-----|-----|-----|-----|-----|-----|
| RFC-1           | w/o posteriors | 0.45     | 0.63    | 0.45                                                                                                                                                                                                                                                  | <table border="1"> <tr><td></td><td>0</td><td>1</td><td>2</td></tr> <tr><td>0</td><td>1072</td><td>350</td><td>421</td></tr> <tr><td>1</td><td>306</td><td>99</td><td>149</td></tr> <tr><td>2</td><td>461</td><td>128</td><td>294</td></tr> </table> |   | 0 | 1 | 2 | 0    | 1072 | 350 | 421 | 1   | 306 | 99  | 149 | 2   | 461 | 128 | 294 |
|                 |                | 0        | 1       | 2                                                                                                                                                                                                                                                     |                                                                                                                                                                                                                                                      |   |   |   |   |      |      |     |     |     |     |     |     |     |     |     |     |
|                 | 0              | 1072     | 350     | 421                                                                                                                                                                                                                                                   |                                                                                                                                                                                                                                                      |   |   |   |   |      |      |     |     |     |     |     |     |     |     |     |     |
| 1               | 306            | 99       | 149     |                                                                                                                                                                                                                                                       |                                                                                                                                                                                                                                                      |   |   |   |   |      |      |     |     |     |     |     |     |     |     |     |     |
| 2               | 461            | 128      | 294     |                                                                                                                                                                                                                                                       |                                                                                                                                                                                                                                                      |   |   |   |   |      |      |     |     |     |     |     |     |     |     |     |     |
| w/ posteriors   | 0.45           | 0.64     | 0.46    | <table border="1"> <tr><td></td><td>0</td><td>1</td><td>2</td></tr> <tr><td>0</td><td>1097</td><td>314</td><td>432</td></tr> <tr><td>1</td><td>320</td><td>68</td><td>166</td></tr> <tr><td>2</td><td>472</td><td>98</td><td>313</td></tr> </table>   |                                                                                                                                                                                                                                                      | 0 | 1 | 2 | 0 | 1097 | 314  | 432 | 1   | 320 | 68  | 166 | 2   | 472 | 98  | 313 |     |
|                 | 0              | 1        | 2       |                                                                                                                                                                                                                                                       |                                                                                                                                                                                                                                                      |   |   |   |   |      |      |     |     |     |     |     |     |     |     |     |     |
| 0               | 1097           | 314      | 432     |                                                                                                                                                                                                                                                       |                                                                                                                                                                                                                                                      |   |   |   |   |      |      |     |     |     |     |     |     |     |     |     |     |
| 1               | 320            | 68       | 166     |                                                                                                                                                                                                                                                       |                                                                                                                                                                                                                                                      |   |   |   |   |      |      |     |     |     |     |     |     |     |     |     |     |
| 2               | 472            | 98       | 313     |                                                                                                                                                                                                                                                       |                                                                                                                                                                                                                                                      |   |   |   |   |      |      |     |     |     |     |     |     |     |     |     |     |
| only posteriors | 0.39           | 0.58     | 0.41    | <table border="1"> <tr><td></td><td>0</td><td>1</td><td>2</td></tr> <tr><td>0</td><td>856</td><td>421</td><td>566</td></tr> <tr><td>1</td><td>251</td><td>119</td><td>184</td></tr> <tr><td>2</td><td>409</td><td>170</td><td>304</td></tr> </table>  |                                                                                                                                                                                                                                                      | 0 | 1 | 2 | 0 | 856  | 421  | 566 | 1   | 251 | 119 | 184 | 2   | 409 | 170 | 304 |     |
|                 | 0              | 1        | 2       |                                                                                                                                                                                                                                                       |                                                                                                                                                                                                                                                      |   |   |   |   |      |      |     |     |     |     |     |     |     |     |     |     |
| 0               | 856            | 421      | 566     |                                                                                                                                                                                                                                                       |                                                                                                                                                                                                                                                      |   |   |   |   |      |      |     |     |     |     |     |     |     |     |     |     |
| 1               | 251            | 119      | 184     |                                                                                                                                                                                                                                                       |                                                                                                                                                                                                                                                      |   |   |   |   |      |      |     |     |     |     |     |     |     |     |     |     |
| 2               | 409            | 170      | 304     |                                                                                                                                                                                                                                                       |                                                                                                                                                                                                                                                      |   |   |   |   |      |      |     |     |     |     |     |     |     |     |     |     |
| RFC-3           | w/o posteriors | 0.56     | 0.73    | 0.58                                                                                                                                                                                                                                                  | <table border="1"> <tr><td></td><td>0</td><td>1</td><td>2</td></tr> <tr><td>0</td><td>1240</td><td>257</td><td>312</td></tr> <tr><td>1</td><td>287</td><td>85</td><td>161</td></tr> <tr><td>2</td><td>307</td><td>70</td><td>481</td></tr> </table>  |   | 0 | 1 | 2 | 0    | 1240 | 257 | 312 | 1   | 287 | 85  | 161 | 2   | 307 | 70  | 481 |
|                 |                | 0        | 1       | 2                                                                                                                                                                                                                                                     |                                                                                                                                                                                                                                                      |   |   |   |   |      |      |     |     |     |     |     |     |     |     |     |     |
|                 | 0              | 1240     | 257     | 312                                                                                                                                                                                                                                                   |                                                                                                                                                                                                                                                      |   |   |   |   |      |      |     |     |     |     |     |     |     |     |     |     |
| 1               | 287            | 85       | 161     |                                                                                                                                                                                                                                                       |                                                                                                                                                                                                                                                      |   |   |   |   |      |      |     |     |     |     |     |     |     |     |     |     |
| 2               | 307            | 70       | 481     |                                                                                                                                                                                                                                                       |                                                                                                                                                                                                                                                      |   |   |   |   |      |      |     |     |     |     |     |     |     |     |     |     |
| w/ posteriors   | 0.62           | 0.78     | 0.67    | <table border="1"> <tr><td></td><td>0</td><td>1</td><td>2</td></tr> <tr><td>0</td><td>1355</td><td>160</td><td>294</td></tr> <tr><td>1</td><td>246</td><td>101</td><td>186</td></tr> <tr><td>2</td><td>259</td><td>67</td><td>532</td></tr> </table>  |                                                                                                                                                                                                                                                      | 0 | 1 | 2 | 0 | 1355 | 160  | 294 | 1   | 246 | 101 | 186 | 2   | 259 | 67  | 532 |     |
|                 | 0              | 1        | 2       |                                                                                                                                                                                                                                                       |                                                                                                                                                                                                                                                      |   |   |   |   |      |      |     |     |     |     |     |     |     |     |     |     |
| 0               | 1355           | 160      | 294     |                                                                                                                                                                                                                                                       |                                                                                                                                                                                                                                                      |   |   |   |   |      |      |     |     |     |     |     |     |     |     |     |     |
| 1               | 246            | 101      | 186     |                                                                                                                                                                                                                                                       |                                                                                                                                                                                                                                                      |   |   |   |   |      |      |     |     |     |     |     |     |     |     |     |     |
| 2               | 259            | 67       | 532     |                                                                                                                                                                                                                                                       |                                                                                                                                                                                                                                                      |   |   |   |   |      |      |     |     |     |     |     |     |     |     |     |     |
| only posteriors | 0.6            | 0.77     | 0.64    | <table border="1"> <tr><td></td><td>0</td><td>1</td><td>2</td></tr> <tr><td>0</td><td>1258</td><td>213</td><td>338</td></tr> <tr><td>1</td><td>190</td><td>137</td><td>206</td></tr> <tr><td>2</td><td>221</td><td>113</td><td>524</td></tr> </table> |                                                                                                                                                                                                                                                      | 0 | 1 | 2 | 0 | 1258 | 213  | 338 | 1   | 190 | 137 | 206 | 2   | 221 | 113 | 524 |     |
|                 | 0              | 1        | 2       |                                                                                                                                                                                                                                                       |                                                                                                                                                                                                                                                      |   |   |   |   |      |      |     |     |     |     |     |     |     |     |     |     |
| 0               | 1258           | 213      | 338     |                                                                                                                                                                                                                                                       |                                                                                                                                                                                                                                                      |   |   |   |   |      |      |     |     |     |     |     |     |     |     |     |     |
| 1               | 190            | 137      | 206     |                                                                                                                                                                                                                                                       |                                                                                                                                                                                                                                                      |   |   |   |   |      |      |     |     |     |     |     |     |     |     |     |     |
| 2               | 221            | 113      | 524     |                                                                                                                                                                                                                                                       |                                                                                                                                                                                                                                                      |   |   |   |   |      |      |     |     |     |     |     |     |     |     |     |     |
| RFC-7           | w/o posteriors | 0.58     | 0.75    | 0.61                                                                                                                                                                                                                                                  | <table border="1"> <tr><td></td><td>0</td><td>1</td><td>2</td></tr> <tr><td>0</td><td>1256</td><td>211</td><td>282</td></tr> <tr><td>1</td><td>283</td><td>55</td><td>164</td></tr> <tr><td>2</td><td>290</td><td>50</td><td>478</td></tr> </table>  |   | 0 | 1 | 2 | 0    | 1256 | 211 | 282 | 1   | 283 | 55  | 164 | 2   | 290 | 50  | 478 |
|                 |                | 0        | 1       | 2                                                                                                                                                                                                                                                     |                                                                                                                                                                                                                                                      |   |   |   |   |      |      |     |     |     |     |     |     |     |     |     |     |
|                 | 0              | 1256     | 211     | 282                                                                                                                                                                                                                                                   |                                                                                                                                                                                                                                                      |   |   |   |   |      |      |     |     |     |     |     |     |     |     |     |     |
| 1               | 283            | 55       | 164     |                                                                                                                                                                                                                                                       |                                                                                                                                                                                                                                                      |   |   |   |   |      |      |     |     |     |     |     |     |     |     |     |     |
| 2               | 290            | 50       | 478     |                                                                                                                                                                                                                                                       |                                                                                                                                                                                                                                                      |   |   |   |   |      |      |     |     |     |     |     |     |     |     |     |     |
| w/ posteriors   | 0.65           | 0.82     | 0.73    | <table border="1"> <tr><td></td><td>0</td><td>1</td><td>2</td></tr> <tr><td>0</td><td>1369</td><td>76</td><td>304</td></tr> <tr><td>1</td><td>228</td><td>89</td><td>185</td></tr> <tr><td>2</td><td>238</td><td>50</td><td>530</td></tr> </table>    |                                                                                                                                                                                                                                                      | 0 | 1 | 2 | 0 | 1369 | 76   | 304 | 1   | 228 | 89  | 185 | 2   | 238 | 50  | 530 |     |
|                 | 0              | 1        | 2       |                                                                                                                                                                                                                                                       |                                                                                                                                                                                                                                                      |   |   |   |   |      |      |     |     |     |     |     |     |     |     |     |     |
| 0               | 1369           | 76       | 304     |                                                                                                                                                                                                                                                       |                                                                                                                                                                                                                                                      |   |   |   |   |      |      |     |     |     |     |     |     |     |     |     |     |
| 1               | 228            | 89       | 185     |                                                                                                                                                                                                                                                       |                                                                                                                                                                                                                                                      |   |   |   |   |      |      |     |     |     |     |     |     |     |     |     |     |
| 2               | 238            | 50       | 530     |                                                                                                                                                                                                                                                       |                                                                                                                                                                                                                                                      |   |   |   |   |      |      |     |     |     |     |     |     |     |     |     |     |
| only posteriors | 0.64           | 0.82     | 0.73    | <table border="1"> <tr><td></td><td>0</td><td>1</td><td>2</td></tr> <tr><td>0</td><td>1327</td><td>107</td><td>315</td></tr> <tr><td>1</td><td>194</td><td>99</td><td>209</td></tr> <tr><td>2</td><td>196</td><td>73</td><td>549</td></tr> </table>   |                                                                                                                                                                                                                                                      | 0 | 1 | 2 | 0 | 1327 | 107  | 315 | 1   | 194 | 99  | 209 | 2   | 196 | 73  | 549 |     |
|                 | 0              | 1        | 2       |                                                                                                                                                                                                                                                       |                                                                                                                                                                                                                                                      |   |   |   |   |      |      |     |     |     |     |     |     |     |     |     |     |
| 0               | 1327           | 107      | 315     |                                                                                                                                                                                                                                                       |                                                                                                                                                                                                                                                      |   |   |   |   |      |      |     |     |     |     |     |     |     |     |     |     |
| 1               | 194            | 99       | 209     |                                                                                                                                                                                                                                                       |                                                                                                                                                                                                                                                      |   |   |   |   |      |      |     |     |     |     |     |     |     |     |     |     |
| 2               | 196            | 73       | 549     |                                                                                                                                                                                                                                                       |                                                                                                                                                                                                                                                      |   |   |   |   |      |      |     |     |     |     |     |     |     |     |     |     |
| SVC-1           | w/o posteriors | 0.56     | 0.7     | 0.51                                                                                                                                                                                                                                                  | <table border="1"> <tr><td></td><td>0</td><td>1</td><td>2</td></tr> <tr><td>0</td><td>1837</td><td>4</td><td>2</td></tr> <tr><td>1</td><td>554</td><td>0</td><td>0</td></tr> <tr><td>2</td><td>878</td><td>2</td><td>3</td></tr> </table>            |   | 0 | 1 | 2 | 0    | 1837 | 4   | 2   | 1   | 554 | 0   | 0   | 2   | 878 | 2   | 3   |
|                 |                | 0        | 1       | 2                                                                                                                                                                                                                                                     |                                                                                                                                                                                                                                                      |   |   |   |   |      |      |     |     |     |     |     |     |     |     |     |     |
|                 | 0              | 1837     | 4       | 2                                                                                                                                                                                                                                                     |                                                                                                                                                                                                                                                      |   |   |   |   |      |      |     |     |     |     |     |     |     |     |     |     |
| 1               | 554            | 0        | 0       |                                                                                                                                                                                                                                                       |                                                                                                                                                                                                                                                      |   |   |   |   |      |      |     |     |     |     |     |     |     |     |     |     |
| 2               | 878            | 2        | 3       |                                                                                                                                                                                                                                                       |                                                                                                                                                                                                                                                      |   |   |   |   |      |      |     |     |     |     |     |     |     |     |     |     |
| w/ posteriors   | 0.39           | 0.7      | 0.53    | <table border="1"> <tr><td></td><td>0</td><td>1</td><td>2</td></tr> <tr><td>0</td><td>775</td><td>563</td><td>505</td></tr> <tr><td>1</td><td>221</td><td>149</td><td>184</td></tr> <tr><td>2</td><td>378</td><td>156</td><td>349</td></tr> </table>  |                                                                                                                                                                                                                                                      | 0 | 1 | 2 | 0 | 775  | 563  | 505 | 1   | 221 | 149 | 184 | 2   | 378 | 156 | 349 |     |
|                 | 0              | 1        | 2       |                                                                                                                                                                                                                                                       |                                                                                                                                                                                                                                                      |   |   |   |   |      |      |     |     |     |     |     |     |     |     |     |     |
| 0               | 775            | 563      | 505     |                                                                                                                                                                                                                                                       |                                                                                                                                                                                                                                                      |   |   |   |   |      |      |     |     |     |     |     |     |     |     |     |     |
| 1               | 221            | 149      | 184     |                                                                                                                                                                                                                                                       |                                                                                                                                                                                                                                                      |   |   |   |   |      |      |     |     |     |     |     |     |     |     |     |     |
| 2               | 378            | 156      | 349     |                                                                                                                                                                                                                                                       |                                                                                                                                                                                                                                                      |   |   |   |   |      |      |     |     |     |     |     |     |     |     |     |     |
| only posteriors | 0.24           | 0.71     | 0.53    | <table border="1"> <tr><td></td><td>0</td><td>1</td><td>2</td></tr> <tr><td>0</td><td>0</td><td>1048</td><td>795</td></tr> <tr><td>1</td><td>0</td><td>297</td><td>257</td></tr> <tr><td>2</td><td>0</td><td>409</td><td>474</td></tr> </table>       |                                                                                                                                                                                                                                                      | 0 | 1 | 2 | 0 | 0    | 1048 | 795 | 1   | 0   | 297 | 257 | 2   | 0   | 409 | 474 |     |
|                 | 0              | 1        | 2       |                                                                                                                                                                                                                                                       |                                                                                                                                                                                                                                                      |   |   |   |   |      |      |     |     |     |     |     |     |     |     |     |     |
| 0               | 0              | 1048     | 795     |                                                                                                                                                                                                                                                       |                                                                                                                                                                                                                                                      |   |   |   |   |      |      |     |     |     |     |     |     |     |     |     |     |
| 1               | 0              | 297      | 257     |                                                                                                                                                                                                                                                       |                                                                                                                                                                                                                                                      |   |   |   |   |      |      |     |     |     |     |     |     |     |     |     |     |
| 2               | 0              | 409      | 474     |                                                                                                                                                                                                                                                       |                                                                                                                                                                                                                                                      |   |   |   |   |      |      |     |     |     |     |     |     |     |     |     |     |
| SVC-3           | w/o posteriors | 0.41     | 0.71    | 0.54                                                                                                                                                                                                                                                  | <table border="1"> <tr><td></td><td>0</td><td>1</td><td>2</td></tr> <tr><td>0</td><td>714</td><td>616</td><td>479</td></tr> <tr><td>1</td><td>222</td><td>156</td><td>155</td></tr> <tr><td>2</td><td>267</td><td>162</td><td>429</td></tr> </table> |   | 0 | 1 | 2 | 0    | 714  | 616 | 479 | 1   | 222 | 156 | 155 | 2   | 267 | 162 | 429 |
|                 | 0              | 1        | 2       |                                                                                                                                                                                                                                                       |                                                                                                                                                                                                                                                      |   |   |   |   |      |      |     |     |     |     |     |     |     |     |     |     |
| 0               | 714            | 616      | 479     |                                                                                                                                                                                                                                                       |                                                                                                                                                                                                                                                      |   |   |   |   |      |      |     |     |     |     |     |     |     |     |     |     |
| 1               | 222            | 156      | 155     |                                                                                                                                                                                                                                                       |                                                                                                                                                                                                                                                      |   |   |   |   |      |      |     |     |     |     |     |     |     |     |     |     |
| 2               | 267            | 162      | 429     |                                                                                                                                                                                                                                                       |                                                                                                                                                                                                                                                      |   |   |   |   |      |      |     |     |     |     |     |     |     |     |     |     |

Table S1 continued from previous page

| Model   | Input Features  | Accuracy | AUC-ROC | AUC-PRC | Confusion Matrix                                                                                                                                                                                                                                      |  |   |   |   |   |      |     |     |   |     |     |     |   |     |     |     |
|---------|-----------------|----------|---------|---------|-------------------------------------------------------------------------------------------------------------------------------------------------------------------------------------------------------------------------------------------------------|--|---|---|---|---|------|-----|-----|---|-----|-----|-----|---|-----|-----|-----|
|         |                 |          |         |         | <table border="1"> <tr><td></td><td>0</td><td>1</td><td>2</td></tr> <tr><td>0</td><td>1271</td><td>286</td><td>252</td></tr> <tr><td>1</td><td>231</td><td>157</td><td>145</td></tr> <tr><td>2</td><td>276</td><td>132</td><td>450</td></tr> </table> |  | 0 | 1 | 2 | 0 | 1271 | 286 | 252 | 1 | 231 | 157 | 145 | 2 | 276 | 132 | 450 |
|         | 0               | 1        | 2       |         |                                                                                                                                                                                                                                                       |  |   |   |   |   |      |     |     |   |     |     |     |   |     |     |     |
| 0       | 1271            | 286      | 252     |         |                                                                                                                                                                                                                                                       |  |   |   |   |   |      |     |     |   |     |     |     |   |     |     |     |
| 1       | 231             | 157      | 145     |         |                                                                                                                                                                                                                                                       |  |   |   |   |   |      |     |     |   |     |     |     |   |     |     |     |
| 2       | 276             | 132      | 450     |         |                                                                                                                                                                                                                                                       |  |   |   |   |   |      |     |     |   |     |     |     |   |     |     |     |
|         | w/ posteriors   | 0.59     | 0.78    | 0.65    |                                                                                                                                                                                                                                                       |  |   |   |   |   |      |     |     |   |     |     |     |   |     |     |     |
|         |                 |          |         |         | <table border="1"> <tr><td></td><td>0</td><td>1</td><td>2</td></tr> <tr><td>0</td><td>1259</td><td>285</td><td>265</td></tr> <tr><td>1</td><td>225</td><td>146</td><td>162</td></tr> <tr><td>2</td><td>253</td><td>124</td><td>481</td></tr> </table> |  | 0 | 1 | 2 | 0 | 1259 | 285 | 265 | 1 | 225 | 146 | 162 | 2 | 253 | 124 | 481 |
|         | 0               | 1        | 2       |         |                                                                                                                                                                                                                                                       |  |   |   |   |   |      |     |     |   |     |     |     |   |     |     |     |
| 0       | 1259            | 285      | 265     |         |                                                                                                                                                                                                                                                       |  |   |   |   |   |      |     |     |   |     |     |     |   |     |     |     |
| 1       | 225             | 146      | 162     |         |                                                                                                                                                                                                                                                       |  |   |   |   |   |      |     |     |   |     |     |     |   |     |     |     |
| 2       | 253             | 124      | 481     |         |                                                                                                                                                                                                                                                       |  |   |   |   |   |      |     |     |   |     |     |     |   |     |     |     |
|         | only posteriors | 0.59     | 0.79    | 0.66    |                                                                                                                                                                                                                                                       |  |   |   |   |   |      |     |     |   |     |     |     |   |     |     |     |
| SVC-7   | w/o posteriors  | 0.4      | 0.72    | 0.55    | <table border="1"> <tr><td></td><td>0</td><td>1</td><td>2</td></tr> <tr><td>0</td><td>679</td><td>634</td><td>436</td></tr> <tr><td>1</td><td>198</td><td>126</td><td>178</td></tr> <tr><td>2</td><td>237</td><td>150</td><td>431</td></tr> </table>  |  | 0 | 1 | 2 | 0 | 679  | 634 | 436 | 1 | 198 | 126 | 178 | 2 | 237 | 150 | 431 |
|         | 0               | 1        | 2       |         |                                                                                                                                                                                                                                                       |  |   |   |   |   |      |     |     |   |     |     |     |   |     |     |     |
| 0       | 679             | 634      | 436     |         |                                                                                                                                                                                                                                                       |  |   |   |   |   |      |     |     |   |     |     |     |   |     |     |     |
| 1       | 198             | 126      | 178     |         |                                                                                                                                                                                                                                                       |  |   |   |   |   |      |     |     |   |     |     |     |   |     |     |     |
| 2       | 237             | 150      | 431     |         |                                                                                                                                                                                                                                                       |  |   |   |   |   |      |     |     |   |     |     |     |   |     |     |     |
|         |                 |          |         |         | <table border="1"> <tr><td></td><td>0</td><td>1</td><td>2</td></tr> <tr><td>0</td><td>1170</td><td>321</td><td>258</td></tr> <tr><td>1</td><td>176</td><td>169</td><td>157</td></tr> <tr><td>2</td><td>196</td><td>166</td><td>456</td></tr> </table> |  | 0 | 1 | 2 | 0 | 1170 | 321 | 258 | 1 | 176 | 169 | 157 | 2 | 196 | 166 | 456 |
|         | 0               | 1        | 2       |         |                                                                                                                                                                                                                                                       |  |   |   |   |   |      |     |     |   |     |     |     |   |     |     |     |
| 0       | 1170            | 321      | 258     |         |                                                                                                                                                                                                                                                       |  |   |   |   |   |      |     |     |   |     |     |     |   |     |     |     |
| 1       | 176             | 169      | 157     |         |                                                                                                                                                                                                                                                       |  |   |   |   |   |      |     |     |   |     |     |     |   |     |     |     |
| 2       | 196             | 166      | 456     |         |                                                                                                                                                                                                                                                       |  |   |   |   |   |      |     |     |   |     |     |     |   |     |     |     |
|         | w/ posteriors   | 0.58     | 0.81    | 0.69    |                                                                                                                                                                                                                                                       |  |   |   |   |   |      |     |     |   |     |     |     |   |     |     |     |
|         |                 |          |         |         | <table border="1"> <tr><td></td><td>0</td><td>1</td><td>2</td></tr> <tr><td>0</td><td>1274</td><td>239</td><td>236</td></tr> <tr><td>1</td><td>203</td><td>144</td><td>155</td></tr> <tr><td>2</td><td>235</td><td>122</td><td>461</td></tr> </table> |  | 0 | 1 | 2 | 0 | 1274 | 239 | 236 | 1 | 203 | 144 | 155 | 2 | 235 | 122 | 461 |
|         | 0               | 1        | 2       |         |                                                                                                                                                                                                                                                       |  |   |   |   |   |      |     |     |   |     |     |     |   |     |     |     |
| 0       | 1274            | 239      | 236     |         |                                                                                                                                                                                                                                                       |  |   |   |   |   |      |     |     |   |     |     |     |   |     |     |     |
| 1       | 203             | 144      | 155     |         |                                                                                                                                                                                                                                                       |  |   |   |   |   |      |     |     |   |     |     |     |   |     |     |     |
| 2       | 235             | 122      | 461     |         |                                                                                                                                                                                                                                                       |  |   |   |   |   |      |     |     |   |     |     |     |   |     |     |     |
|         | only posteriors | 0.61     | 0.81    | 0.69    |                                                                                                                                                                                                                                                       |  |   |   |   |   |      |     |     |   |     |     |     |   |     |     |     |
| RNN-30  | w/o posteriors  | 0.5      | 0.67    | 0.48    | <table border="1"> <tr><td></td><td>0</td><td>1</td><td>2</td></tr> <tr><td>0</td><td>1283</td><td>142</td><td>263</td></tr> <tr><td>1</td><td>387</td><td>31</td><td>80</td></tr> <tr><td>2</td><td>597</td><td>32</td><td>185</td></tr> </table>    |  | 0 | 1 | 2 | 0 | 1283 | 142 | 263 | 1 | 387 | 31  | 80  | 2 | 597 | 32  | 185 |
|         | 0               | 1        | 2       |         |                                                                                                                                                                                                                                                       |  |   |   |   |   |      |     |     |   |     |     |     |   |     |     |     |
| 0       | 1283            | 142      | 263     |         |                                                                                                                                                                                                                                                       |  |   |   |   |   |      |     |     |   |     |     |     |   |     |     |     |
| 1       | 387             | 31       | 80      |         |                                                                                                                                                                                                                                                       |  |   |   |   |   |      |     |     |   |     |     |     |   |     |     |     |
| 2       | 597             | 32       | 185     |         |                                                                                                                                                                                                                                                       |  |   |   |   |   |      |     |     |   |     |     |     |   |     |     |     |
|         |                 |          |         |         | <table border="1"> <tr><td></td><td>0</td><td>1</td><td>2</td></tr> <tr><td>0</td><td>1468</td><td>57</td><td>163</td></tr> <tr><td>1</td><td>432</td><td>12</td><td>54</td></tr> <tr><td>2</td><td>687</td><td>10</td><td>117</td></tr> </table>     |  | 0 | 1 | 2 | 0 | 1468 | 57  | 163 | 1 | 432 | 12  | 54  | 2 | 687 | 10  | 117 |
|         | 0               | 1        | 2       |         |                                                                                                                                                                                                                                                       |  |   |   |   |   |      |     |     |   |     |     |     |   |     |     |     |
| 0       | 1468            | 57       | 163     |         |                                                                                                                                                                                                                                                       |  |   |   |   |   |      |     |     |   |     |     |     |   |     |     |     |
| 1       | 432             | 12       | 54      |         |                                                                                                                                                                                                                                                       |  |   |   |   |   |      |     |     |   |     |     |     |   |     |     |     |
| 2       | 687             | 10       | 117     |         |                                                                                                                                                                                                                                                       |  |   |   |   |   |      |     |     |   |     |     |     |   |     |     |     |
|         | w/ posteriors   | 0.53     | 0.69    | 0.51    |                                                                                                                                                                                                                                                       |  |   |   |   |   |      |     |     |   |     |     |     |   |     |     |     |
|         |                 |          |         |         | <table border="1"> <tr><td></td><td>0</td><td>1</td><td>2</td></tr> <tr><td>0</td><td>1661</td><td>0</td><td>27</td></tr> <tr><td>1</td><td>490</td><td>0</td><td>8</td></tr> <tr><td>2</td><td>789</td><td>0</td><td>25</td></tr> </table>           |  | 0 | 1 | 2 | 0 | 1661 | 0   | 27  | 1 | 490 | 0   | 8   | 2 | 789 | 0   | 25  |
|         | 0               | 1        | 2       |         |                                                                                                                                                                                                                                                       |  |   |   |   |   |      |     |     |   |     |     |     |   |     |     |     |
| 0       | 1661            | 0        | 27      |         |                                                                                                                                                                                                                                                       |  |   |   |   |   |      |     |     |   |     |     |     |   |     |     |     |
| 1       | 490             | 0        | 8       |         |                                                                                                                                                                                                                                                       |  |   |   |   |   |      |     |     |   |     |     |     |   |     |     |     |
| 2       | 789             | 0        | 25      |         |                                                                                                                                                                                                                                                       |  |   |   |   |   |      |     |     |   |     |     |     |   |     |     |     |
|         | only posteriors | 0.56     | 0.71    | 0.53    |                                                                                                                                                                                                                                                       |  |   |   |   |   |      |     |     |   |     |     |     |   |     |     |     |
| RNN-91  | w/o posteriors  | 0.5      | 0.67    | 0.47    | <table border="1"> <tr><td></td><td>0</td><td>1</td><td>2</td></tr> <tr><td>0</td><td>1411</td><td>150</td><td>188</td></tr> <tr><td>1</td><td>449</td><td>31</td><td>54</td></tr> <tr><td>2</td><td>684</td><td>25</td><td>132</td></tr> </table>    |  | 0 | 1 | 2 | 0 | 1411 | 150 | 188 | 1 | 449 | 31  | 54  | 2 | 684 | 25  | 132 |
|         | 0               | 1        | 2       |         |                                                                                                                                                                                                                                                       |  |   |   |   |   |      |     |     |   |     |     |     |   |     |     |     |
| 0       | 1411            | 150      | 188     |         |                                                                                                                                                                                                                                                       |  |   |   |   |   |      |     |     |   |     |     |     |   |     |     |     |
| 1       | 449             | 31       | 54      |         |                                                                                                                                                                                                                                                       |  |   |   |   |   |      |     |     |   |     |     |     |   |     |     |     |
| 2       | 684             | 25       | 132     |         |                                                                                                                                                                                                                                                       |  |   |   |   |   |      |     |     |   |     |     |     |   |     |     |     |
|         |                 |          |         |         | <table border="1"> <tr><td></td><td>0</td><td>1</td><td>2</td></tr> <tr><td>0</td><td>1440</td><td>170</td><td>139</td></tr> <tr><td>1</td><td>459</td><td>33</td><td>42</td></tr> <tr><td>2</td><td>688</td><td>25</td><td>128</td></tr> </table>    |  | 0 | 1 | 2 | 0 | 1440 | 170 | 139 | 1 | 459 | 33  | 42  | 2 | 688 | 25  | 128 |
|         | 0               | 1        | 2       |         |                                                                                                                                                                                                                                                       |  |   |   |   |   |      |     |     |   |     |     |     |   |     |     |     |
| 0       | 1440            | 170      | 139     |         |                                                                                                                                                                                                                                                       |  |   |   |   |   |      |     |     |   |     |     |     |   |     |     |     |
| 1       | 459             | 33       | 42      |         |                                                                                                                                                                                                                                                       |  |   |   |   |   |      |     |     |   |     |     |     |   |     |     |     |
| 2       | 688             | 25       | 128     |         |                                                                                                                                                                                                                                                       |  |   |   |   |   |      |     |     |   |     |     |     |   |     |     |     |
|         | w/ posteriors   | 0.51     | 0.67    | 0.48    |                                                                                                                                                                                                                                                       |  |   |   |   |   |      |     |     |   |     |     |     |   |     |     |     |
|         |                 |          |         |         | <table border="1"> <tr><td></td><td>0</td><td>1</td><td>2</td></tr> <tr><td>0</td><td>1749</td><td>0</td><td>0</td></tr> <tr><td>1</td><td>534</td><td>0</td><td>0</td></tr> <tr><td>2</td><td>841</td><td>0</td><td>0</td></tr> </table>             |  | 0 | 1 | 2 | 0 | 1749 | 0   | 0   | 1 | 534 | 0   | 0   | 2 | 841 | 0   | 0   |
|         | 0               | 1        | 2       |         |                                                                                                                                                                                                                                                       |  |   |   |   |   |      |     |     |   |     |     |     |   |     |     |     |
| 0       | 1749            | 0        | 0       |         |                                                                                                                                                                                                                                                       |  |   |   |   |   |      |     |     |   |     |     |     |   |     |     |     |
| 1       | 534             | 0        | 0       |         |                                                                                                                                                                                                                                                       |  |   |   |   |   |      |     |     |   |     |     |     |   |     |     |     |
| 2       | 841             | 0        | 0       |         |                                                                                                                                                                                                                                                       |  |   |   |   |   |      |     |     |   |     |     |     |   |     |     |     |
|         | only posteriors | 0.56     | 0.71    | 0.53    |                                                                                                                                                                                                                                                       |  |   |   |   |   |      |     |     |   |     |     |     |   |     |     |     |
| RNN-182 | w/o posteriors  | 0.51     | 0.67    | 0.46    | <table border="1"> <tr><td></td><td>0</td><td>1</td><td>2</td></tr> <tr><td>0</td><td>1382</td><td>115</td><td>279</td></tr> <tr><td>1</td><td>419</td><td>33</td><td>84</td></tr> <tr><td>2</td><td>637</td><td>27</td><td>187</td></tr> </table>    |  | 0 | 1 | 2 | 0 | 1382 | 115 | 279 | 1 | 419 | 33  | 84  | 2 | 637 | 27  | 187 |
|         | 0               | 1        | 2       |         |                                                                                                                                                                                                                                                       |  |   |   |   |   |      |     |     |   |     |     |     |   |     |     |     |
| 0       | 1382            | 115      | 279     |         |                                                                                                                                                                                                                                                       |  |   |   |   |   |      |     |     |   |     |     |     |   |     |     |     |
| 1       | 419             | 33       | 84      |         |                                                                                                                                                                                                                                                       |  |   |   |   |   |      |     |     |   |     |     |     |   |     |     |     |
| 2       | 637             | 27       | 187     |         |                                                                                                                                                                                                                                                       |  |   |   |   |   |      |     |     |   |     |     |     |   |     |     |     |
|         |                 |          |         |         | <table border="1"> <tr><td></td><td>0</td><td>1</td><td>2</td></tr> <tr><td>0</td><td>1508</td><td>139</td><td>129</td></tr> <tr><td>1</td><td>459</td><td>32</td><td>45</td></tr> <tr><td>2</td><td>707</td><td>23</td><td>121</td></tr> </table>    |  | 0 | 1 | 2 | 0 | 1508 | 139 | 129 | 1 | 459 | 32  | 45  | 2 | 707 | 23  | 121 |
|         | 0               | 1        | 2       |         |                                                                                                                                                                                                                                                       |  |   |   |   |   |      |     |     |   |     |     |     |   |     |     |     |
| 0       | 1508            | 139      | 129     |         |                                                                                                                                                                                                                                                       |  |   |   |   |   |      |     |     |   |     |     |     |   |     |     |     |
| 1       | 459             | 32       | 45      |         |                                                                                                                                                                                                                                                       |  |   |   |   |   |      |     |     |   |     |     |     |   |     |     |     |
| 2       | 707             | 23       | 121     |         |                                                                                                                                                                                                                                                       |  |   |   |   |   |      |     |     |   |     |     |     |   |     |     |     |
|         | w/ posteriors   | 0.53     | 0.68    | 0.48    |                                                                                                                                                                                                                                                       |  |   |   |   |   |      |     |     |   |     |     |     |   |     |     |     |

**Table S1 continued from previous page**

| Model    | Input Features  | Accuracy | AUC-ROC | AUC-PRC | Confusion Matrix                                                                                                                                                                                                                                   |  |   |   |   |   |      |     |     |   |     |    |    |   |     |    |     |
|----------|-----------------|----------|---------|---------|----------------------------------------------------------------------------------------------------------------------------------------------------------------------------------------------------------------------------------------------------|--|---|---|---|---|------|-----|-----|---|-----|----|----|---|-----|----|-----|
|          |                 |          |         |         | <table border="1"> <tr><td></td><td>0</td><td>1</td><td>2</td></tr> <tr><td>0</td><td>1705</td><td>0</td><td>71</td></tr> <tr><td>1</td><td>512</td><td>0</td><td>24</td></tr> <tr><td>2</td><td>770</td><td>0</td><td>81</td></tr> </table>       |  | 0 | 1 | 2 | 0 | 1705 | 0   | 71  | 1 | 512 | 0  | 24 | 2 | 770 | 0  | 81  |
|          | 0               | 1        | 2       |         |                                                                                                                                                                                                                                                    |  |   |   |   |   |      |     |     |   |     |    |    |   |     |    |     |
| 0        | 1705            | 0        | 71      |         |                                                                                                                                                                                                                                                    |  |   |   |   |   |      |     |     |   |     |    |    |   |     |    |     |
| 1        | 512             | 0        | 24      |         |                                                                                                                                                                                                                                                    |  |   |   |   |   |      |     |     |   |     |    |    |   |     |    |     |
| 2        | 770             | 0        | 81      |         |                                                                                                                                                                                                                                                    |  |   |   |   |   |      |     |     |   |     |    |    |   |     |    |     |
| LSTM-30  | only posteriors | 0.56     | 0.71    | 0.53    |                                                                                                                                                                                                                                                    |  |   |   |   |   |      |     |     |   |     |    |    |   |     |    |     |
|          |                 |          |         |         | <table border="1"> <tr><td></td><td>0</td><td>1</td><td>2</td></tr> <tr><td>0</td><td>1336</td><td>139</td><td>213</td></tr> <tr><td>1</td><td>401</td><td>30</td><td>67</td></tr> <tr><td>2</td><td>626</td><td>27</td><td>161</td></tr> </table> |  | 0 | 1 | 2 | 0 | 1336 | 139 | 213 | 1 | 401 | 30 | 67 | 2 | 626 | 27 | 161 |
|          | 0               | 1        | 2       |         |                                                                                                                                                                                                                                                    |  |   |   |   |   |      |     |     |   |     |    |    |   |     |    |     |
| 0        | 1336            | 139      | 213     |         |                                                                                                                                                                                                                                                    |  |   |   |   |   |      |     |     |   |     |    |    |   |     |    |     |
| 1        | 401             | 30       | 67      |         |                                                                                                                                                                                                                                                    |  |   |   |   |   |      |     |     |   |     |    |    |   |     |    |     |
| 2        | 626             | 27       | 161     |         |                                                                                                                                                                                                                                                    |  |   |   |   |   |      |     |     |   |     |    |    |   |     |    |     |
| LSTM-30  | w/o posteriors  | 0.51     | 0.67    | 0.48    |                                                                                                                                                                                                                                                    |  |   |   |   |   |      |     |     |   |     |    |    |   |     |    |     |
|          |                 |          |         |         | <table border="1"> <tr><td></td><td>0</td><td>1</td><td>2</td></tr> <tr><td>0</td><td>1303</td><td>146</td><td>239</td></tr> <tr><td>1</td><td>408</td><td>17</td><td>73</td></tr> <tr><td>2</td><td>585</td><td>44</td><td>185</td></tr> </table> |  | 0 | 1 | 2 | 0 | 1303 | 146 | 239 | 1 | 408 | 17 | 73 | 2 | 585 | 44 | 185 |
|          | 0               | 1        | 2       |         |                                                                                                                                                                                                                                                    |  |   |   |   |   |      |     |     |   |     |    |    |   |     |    |     |
| 0        | 1303            | 146      | 239     |         |                                                                                                                                                                                                                                                    |  |   |   |   |   |      |     |     |   |     |    |    |   |     |    |     |
| 1        | 408             | 17       | 73      |         |                                                                                                                                                                                                                                                    |  |   |   |   |   |      |     |     |   |     |    |    |   |     |    |     |
| 2        | 585             | 44       | 185     |         |                                                                                                                                                                                                                                                    |  |   |   |   |   |      |     |     |   |     |    |    |   |     |    |     |
| LSTM-30  | w/ posteriors   | 0.5      | 0.67    | 0.48    |                                                                                                                                                                                                                                                    |  |   |   |   |   |      |     |     |   |     |    |    |   |     |    |     |
|          |                 |          |         |         | <table border="1"> <tr><td></td><td>0</td><td>1</td><td>2</td></tr> <tr><td>0</td><td>1688</td><td>0</td><td>0</td></tr> <tr><td>1</td><td>498</td><td>0</td><td>0</td></tr> <tr><td>2</td><td>814</td><td>0</td><td>0</td></tr> </table>          |  | 0 | 1 | 2 | 0 | 1688 | 0   | 0   | 1 | 498 | 0  | 0  | 2 | 814 | 0  | 0   |
|          | 0               | 1        | 2       |         |                                                                                                                                                                                                                                                    |  |   |   |   |   |      |     |     |   |     |    |    |   |     |    |     |
| 0        | 1688            | 0        | 0       |         |                                                                                                                                                                                                                                                    |  |   |   |   |   |      |     |     |   |     |    |    |   |     |    |     |
| 1        | 498             | 0        | 0       |         |                                                                                                                                                                                                                                                    |  |   |   |   |   |      |     |     |   |     |    |    |   |     |    |     |
| 2        | 814             | 0        | 0       |         |                                                                                                                                                                                                                                                    |  |   |   |   |   |      |     |     |   |     |    |    |   |     |    |     |
| LSTM-91  | only posteriors | 0.56     | 0.72    | 0.55    |                                                                                                                                                                                                                                                    |  |   |   |   |   |      |     |     |   |     |    |    |   |     |    |     |
|          |                 |          |         |         | <table border="1"> <tr><td></td><td>0</td><td>1</td><td>2</td></tr> <tr><td>0</td><td>1483</td><td>82</td><td>184</td></tr> <tr><td>1</td><td>444</td><td>28</td><td>62</td></tr> <tr><td>2</td><td>709</td><td>18</td><td>114</td></tr> </table>  |  | 0 | 1 | 2 | 0 | 1483 | 82  | 184 | 1 | 444 | 28 | 62 | 2 | 709 | 18 | 114 |
|          | 0               | 1        | 2       |         |                                                                                                                                                                                                                                                    |  |   |   |   |   |      |     |     |   |     |    |    |   |     |    |     |
| 0        | 1483            | 82       | 184     |         |                                                                                                                                                                                                                                                    |  |   |   |   |   |      |     |     |   |     |    |    |   |     |    |     |
| 1        | 444             | 28       | 62      |         |                                                                                                                                                                                                                                                    |  |   |   |   |   |      |     |     |   |     |    |    |   |     |    |     |
| 2        | 709             | 18       | 114     |         |                                                                                                                                                                                                                                                    |  |   |   |   |   |      |     |     |   |     |    |    |   |     |    |     |
| LSTM-91  | w/o posteriors  | 0.52     | 0.68    | 0.49    |                                                                                                                                                                                                                                                    |  |   |   |   |   |      |     |     |   |     |    |    |   |     |    |     |
|          |                 |          |         |         | <table border="1"> <tr><td></td><td>0</td><td>1</td><td>2</td></tr> <tr><td>0</td><td>1418</td><td>134</td><td>197</td></tr> <tr><td>1</td><td>441</td><td>31</td><td>62</td></tr> <tr><td>2</td><td>681</td><td>18</td><td>142</td></tr> </table> |  | 0 | 1 | 2 | 0 | 1418 | 134 | 197 | 1 | 441 | 31 | 62 | 2 | 681 | 18 | 142 |
|          | 0               | 1        | 2       |         |                                                                                                                                                                                                                                                    |  |   |   |   |   |      |     |     |   |     |    |    |   |     |    |     |
| 0        | 1418            | 134      | 197     |         |                                                                                                                                                                                                                                                    |  |   |   |   |   |      |     |     |   |     |    |    |   |     |    |     |
| 1        | 441             | 31       | 62      |         |                                                                                                                                                                                                                                                    |  |   |   |   |   |      |     |     |   |     |    |    |   |     |    |     |
| 2        | 681             | 18       | 142     |         |                                                                                                                                                                                                                                                    |  |   |   |   |   |      |     |     |   |     |    |    |   |     |    |     |
| LSTM-91  | w/ posteriors   | 0.51     | 0.68    | 0.5     |                                                                                                                                                                                                                                                    |  |   |   |   |   |      |     |     |   |     |    |    |   |     |    |     |
|          |                 |          |         |         | <table border="1"> <tr><td></td><td>0</td><td>1</td><td>2</td></tr> <tr><td>0</td><td>1669</td><td>0</td><td>80</td></tr> <tr><td>1</td><td>492</td><td>0</td><td>42</td></tr> <tr><td>2</td><td>729</td><td>0</td><td>112</td></tr> </table>      |  | 0 | 1 | 2 | 0 | 1669 | 0   | 80  | 1 | 492 | 0  | 42 | 2 | 729 | 0  | 112 |
|          | 0               | 1        | 2       |         |                                                                                                                                                                                                                                                    |  |   |   |   |   |      |     |     |   |     |    |    |   |     |    |     |
| 0        | 1669            | 0        | 80      |         |                                                                                                                                                                                                                                                    |  |   |   |   |   |      |     |     |   |     |    |    |   |     |    |     |
| 1        | 492             | 0        | 42      |         |                                                                                                                                                                                                                                                    |  |   |   |   |   |      |     |     |   |     |    |    |   |     |    |     |
| 2        | 729             | 0        | 112     |         |                                                                                                                                                                                                                                                    |  |   |   |   |   |      |     |     |   |     |    |    |   |     |    |     |
| LSTM-182 | only posteriors | 0.57     | 0.7     | 0.52    |                                                                                                                                                                                                                                                    |  |   |   |   |   |      |     |     |   |     |    |    |   |     |    |     |
|          |                 |          |         |         | <table border="1"> <tr><td></td><td>0</td><td>1</td><td>2</td></tr> <tr><td>0</td><td>1520</td><td>100</td><td>156</td></tr> <tr><td>1</td><td>470</td><td>31</td><td>35</td></tr> <tr><td>2</td><td>750</td><td>22</td><td>79</td></tr> </table>  |  | 0 | 1 | 2 | 0 | 1520 | 100 | 156 | 1 | 470 | 31 | 35 | 2 | 750 | 22 | 79  |
|          | 0               | 1        | 2       |         |                                                                                                                                                                                                                                                    |  |   |   |   |   |      |     |     |   |     |    |    |   |     |    |     |
| 0        | 1520            | 100      | 156     |         |                                                                                                                                                                                                                                                    |  |   |   |   |   |      |     |     |   |     |    |    |   |     |    |     |
| 1        | 470             | 31       | 35      |         |                                                                                                                                                                                                                                                    |  |   |   |   |   |      |     |     |   |     |    |    |   |     |    |     |
| 2        | 750             | 22       | 79      |         |                                                                                                                                                                                                                                                    |  |   |   |   |   |      |     |     |   |     |    |    |   |     |    |     |
| LSTM-182 | w/o posteriors  | 0.52     | 0.68    | 0.49    |                                                                                                                                                                                                                                                    |  |   |   |   |   |      |     |     |   |     |    |    |   |     |    |     |
|          |                 |          |         |         | <table border="1"> <tr><td></td><td>0</td><td>1</td><td>2</td></tr> <tr><td>0</td><td>1583</td><td>71</td><td>122</td></tr> <tr><td>1</td><td>487</td><td>25</td><td>24</td></tr> <tr><td>2</td><td>756</td><td>21</td><td>74</td></tr> </table>   |  | 0 | 1 | 2 | 0 | 1583 | 71  | 122 | 1 | 487 | 25 | 24 | 2 | 756 | 21 | 74  |
|          | 0               | 1        | 2       |         |                                                                                                                                                                                                                                                    |  |   |   |   |   |      |     |     |   |     |    |    |   |     |    |     |
| 0        | 1583            | 71       | 122     |         |                                                                                                                                                                                                                                                    |  |   |   |   |   |      |     |     |   |     |    |    |   |     |    |     |
| 1        | 487             | 25       | 24      |         |                                                                                                                                                                                                                                                    |  |   |   |   |   |      |     |     |   |     |    |    |   |     |    |     |
| 2        | 756             | 21       | 74      |         |                                                                                                                                                                                                                                                    |  |   |   |   |   |      |     |     |   |     |    |    |   |     |    |     |
| LSTM-182 | w/ posteriors   | 0.53     | 0.68    | 0.49    |                                                                                                                                                                                                                                                    |  |   |   |   |   |      |     |     |   |     |    |    |   |     |    |     |
|          |                 |          |         |         | <table border="1"> <tr><td></td><td>0</td><td>1</td><td>2</td></tr> <tr><td>0</td><td>1776</td><td>0</td><td>0</td></tr> <tr><td>1</td><td>536</td><td>0</td><td>0</td></tr> <tr><td>2</td><td>851</td><td>0</td><td>0</td></tr> </table>          |  | 0 | 1 | 2 | 0 | 1776 | 0   | 0   | 1 | 536 | 0  | 0  | 2 | 851 | 0  | 0   |
|          | 0               | 1        | 2       |         |                                                                                                                                                                                                                                                    |  |   |   |   |   |      |     |     |   |     |    |    |   |     |    |     |
| 0        | 1776            | 0        | 0       |         |                                                                                                                                                                                                                                                    |  |   |   |   |   |      |     |     |   |     |    |    |   |     |    |     |
| 1        | 536             | 0        | 0       |         |                                                                                                                                                                                                                                                    |  |   |   |   |   |      |     |     |   |     |    |    |   |     |    |     |
| 2        | 851             | 0        | 0       |         |                                                                                                                                                                                                                                                    |  |   |   |   |   |      |     |     |   |     |    |    |   |     |    |     |
| LSTM-182 | only posteriors | 0.56     | 0.71    | 0.53    |                                                                                                                                                                                                                                                    |  |   |   |   |   |      |     |     |   |     |    |    |   |     |    |     |
|          |                 |          |         |         | <table border="1"> <tr><td></td><td>0</td><td>1</td><td>2</td></tr> <tr><td>0</td><td>1363</td><td>114</td><td>211</td></tr> <tr><td>1</td><td>401</td><td>32</td><td>65</td></tr> <tr><td>2</td><td>649</td><td>24</td><td>141</td></tr> </table> |  | 0 | 1 | 2 | 0 | 1363 | 114 | 211 | 1 | 401 | 32 | 65 | 2 | 649 | 24 | 141 |
|          | 0               | 1        | 2       |         |                                                                                                                                                                                                                                                    |  |   |   |   |   |      |     |     |   |     |    |    |   |     |    |     |
| 0        | 1363            | 114      | 211     |         |                                                                                                                                                                                                                                                    |  |   |   |   |   |      |     |     |   |     |    |    |   |     |    |     |
| 1        | 401             | 32       | 65      |         |                                                                                                                                                                                                                                                    |  |   |   |   |   |      |     |     |   |     |    |    |   |     |    |     |
| 2        | 649             | 24       | 141     |         |                                                                                                                                                                                                                                                    |  |   |   |   |   |      |     |     |   |     |    |    |   |     |    |     |
| GRU-30   | w/o posteriors  | 0.51     | 0.68    | 0.48    |                                                                                                                                                                                                                                                    |  |   |   |   |   |      |     |     |   |     |    |    |   |     |    |     |
|          |                 |          |         |         | <table border="1"> <tr><td></td><td>0</td><td>1</td><td>2</td></tr> <tr><td>0</td><td>1379</td><td>77</td><td>232</td></tr> <tr><td>1</td><td>418</td><td>17</td><td>63</td></tr> <tr><td>2</td><td>613</td><td>18</td><td>183</td></tr> </table>  |  | 0 | 1 | 2 | 0 | 1379 | 77  | 232 | 1 | 418 | 17 | 63 | 2 | 613 | 18 | 183 |
|          | 0               | 1        | 2       |         |                                                                                                                                                                                                                                                    |  |   |   |   |   |      |     |     |   |     |    |    |   |     |    |     |
| 0        | 1379            | 77       | 232     |         |                                                                                                                                                                                                                                                    |  |   |   |   |   |      |     |     |   |     |    |    |   |     |    |     |
| 1        | 418             | 17       | 63      |         |                                                                                                                                                                                                                                                    |  |   |   |   |   |      |     |     |   |     |    |    |   |     |    |     |
| 2        | 613             | 18       | 183     |         |                                                                                                                                                                                                                                                    |  |   |   |   |   |      |     |     |   |     |    |    |   |     |    |     |
| GRU-30   | w/ posteriors   | 0.53     | 0.69    | 0.51    |                                                                                                                                                                                                                                                    |  |   |   |   |   |      |     |     |   |     |    |    |   |     |    |     |
|          |                 |          |         |         | <table border="1"> <tr><td></td><td>0</td><td>1</td><td>2</td></tr> <tr><td>0</td><td>1663</td><td>0</td><td>25</td></tr> <tr><td>1</td><td>490</td><td>0</td><td>8</td></tr> <tr><td>2</td><td>791</td><td>0</td><td>23</td></tr> </table>        |  | 0 | 1 | 2 | 0 | 1663 | 0   | 25  | 1 | 490 | 0  | 8  | 2 | 791 | 0  | 23  |
|          | 0               | 1        | 2       |         |                                                                                                                                                                                                                                                    |  |   |   |   |   |      |     |     |   |     |    |    |   |     |    |     |
| 0        | 1663            | 0        | 25      |         |                                                                                                                                                                                                                                                    |  |   |   |   |   |      |     |     |   |     |    |    |   |     |    |     |
| 1        | 490             | 0        | 8       |         |                                                                                                                                                                                                                                                    |  |   |   |   |   |      |     |     |   |     |    |    |   |     |    |     |
| 2        | 791             | 0        | 23      |         |                                                                                                                                                                                                                                                    |  |   |   |   |   |      |     |     |   |     |    |    |   |     |    |     |
| GRU-30   | only posteriors | 0.56     | 0.71    | 0.53    |                                                                                                                                                                                                                                                    |  |   |   |   |   |      |     |     |   |     |    |    |   |     |    |     |

**Table S1 continued from previous page**

| Model   | Input Features  | Accuracy | AUC-ROC | AUC-PRC | Confusion Matrix |      |     |     |
|---------|-----------------|----------|---------|---------|------------------|------|-----|-----|
| GRU-91  | w/o posteriors  | 0.5      | 0.67    | 0.47    | 0                | 1    | 2   |     |
|         |                 |          |         |         | 0                | 1414 | 144 | 191 |
|         |                 |          |         |         | 1                | 441  | 35  | 58  |
|         | 2               | 689      | 36      | 116     |                  |      |     |     |
|         | w/ posteriors   | 0.56     | 0.7     | 0.52    | 0                | 1    | 2   |     |
|         |                 |          |         |         | 0                | 1742 | 3   | 4   |
|         |                 |          |         |         | 1                | 531  | 1   | 2   |
|         | 2               | 826      | 0       | 15      |                  |      |     |     |
|         | only posteriors | 0.56     | 0.71    | 0.53    | 0                | 1    | 2   |     |
| 0       |                 |          |         |         | 1743             | 1    | 5   |     |
| 1       |                 |          |         |         | 533              | 0    | 1   |     |
| 2       | 840             | 0        | 1       |         |                  |      |     |     |
| GRU-182 | w/o posteriors  | 0.52     | 0.67    | 0.47    | 0                | 1    | 2   |     |
|         |                 |          |         |         | 0                | 1518 | 93  | 165 |
|         |                 |          |         |         | 1                | 465  | 28  | 43  |
|         | 2               | 726      | 37      | 88      |                  |      |     |     |
|         | w/ posteriors   | 0.53     | 0.68    | 0.5     | 0                | 1    | 2   |     |
|         |                 |          |         |         | 0                | 1527 | 94  | 155 |
|         |                 |          |         |         | 1                | 467  | 30  | 39  |
|         | 2               | 707      | 34      | 110     |                  |      |     |     |
|         | only posteriors | 0.56     | 0.72    | 0.55    | 0                | 1    | 2   |     |
| 0       |                 |          |         |         | 1774             | 0    | 2   |     |
| 1       |                 |          |         |         | 535              | 0    | 1   |     |
| 2       | 851             | 0        | 0       |         |                  |      |     |     |

**Table S2 - Classifier performance overview - Emotional arousal-valence case.**

Class labels: 0 - neutral, 1 - high arousal - positive valence, 2 - high arousal - negative valence, 3 - low arousal - negative valence, 4 - low arousal - positive valence.

| Model | Input Features  | Accuracy | AUC-ROC | AUC-PRC | Confusion Matrix |     |     |     |     |     |
|-------|-----------------|----------|---------|---------|------------------|-----|-----|-----|-----|-----|
|       |                 |          |         |         | 0                | 1   | 2   | 3   | 4   |     |
| LR-1  | w/o posteriors  | 0.27     | 0.52    | 0.22    | 0                | 155 | 165 | 6   | 181 | 47  |
|       | 1               |          |         |         | 124              | 271 | 5   | 206 | 47  |     |
|       | 2               |          |         |         | 150              | 138 | 0   | 168 | 24  |     |
|       |                 |          |         |         | 3                | 431 | 397 | 2   | 438 | 95  |
|       |                 |          |         |         | 4                | 48  | 74  | 0   | 76  | 32  |
|       |                 |          |         |         | 0                | 0   | 1   | 2   | 3   | 4   |
|       | w/ posteriors   | 0.27     | 0.52    | 0.22    | 0                | 155 | 165 | 6   | 181 | 47  |
|       |                 |          |         |         | 1                | 124 | 271 | 5   | 206 | 47  |
|       |                 |          |         |         | 2                | 150 | 138 | 0   | 168 | 24  |
|       |                 |          |         |         | 3                | 431 | 397 | 2   | 438 | 95  |
|       |                 |          |         |         | 4                | 48  | 74  | 0   | 76  | 32  |
|       |                 |          |         |         | 0                | 0   | 1   | 2   | 3   | 4   |
|       | only posteriors | 0.16     | 0.54    | 0.21    | 0                | 314 | 123 | 0   | 13  | 104 |
|       |                 |          |         |         | 1                | 308 | 139 | 0   | 26  | 180 |
|       |                 |          |         |         | 2                | 292 | 81  | 0   | 19  | 88  |
|       |                 |          |         |         | 3                | 798 | 260 | 0   | 41  | 264 |
|       |                 |          |         |         | 4                | 114 | 67  | 0   | 10  | 39  |
|       |                 |          |         |         | 0                | 0   | 1   | 2   | 3   | 4   |
| LR-3  | w/o posteriors  | 0.27     | 0.53    | 0.22    | 0                | 177 | 134 | 27  | 87  | 108 |
|       | 1               |          |         |         | 111              | 240 | 22  | 134 | 123 |     |
|       | 2               |          |         |         | 158              | 129 | 19  | 98  | 66  |     |
|       |                 |          |         |         | 3                | 422 | 337 | 43  | 349 | 188 |
|       |                 |          |         |         | 4                | 45  | 58  | 9   | 50  | 66  |
|       |                 |          |         |         | 0                | 0   | 1   | 2   | 3   | 4   |
|       | w/ posteriors   | 0.29     | 0.56    | 0.24    | 0                | 206 | 122 | 68  | 80  | 57  |
|       |                 |          |         |         | 1                | 129 | 230 | 50  | 140 | 81  |
|       |                 |          |         |         | 2                | 117 | 108 | 128 | 82  | 35  |
|       |                 |          |         |         | 3                | 338 | 334 | 218 | 311 | 138 |
|       |                 |          |         |         | 4                | 61  | 65  | 16  | 36  | 50  |
|       |                 |          |         |         | 0                | 0   | 1   | 2   | 3   | 4   |
|       | only posteriors | 0.34     | 0.63    | 0.29    | 0                | 174 | 69  | 81  | 96  | 113 |
|       |                 |          |         |         | 1                | 99  | 142 | 63  | 154 | 172 |
|       |                 |          |         |         | 2                | 90  | 55  | 155 | 108 | 62  |
|       |                 |          |         |         | 3                | 225 | 132 | 283 | 540 | 159 |
|       |                 |          |         |         | 4                | 49  | 28  | 19  | 55  | 77  |
|       |                 |          |         |         | 0                | 0   | 1   | 2   | 3   | 4   |
| LR-7  | w/o posteriors  | 0.26     | 0.53    | 0.22    | 0                | 151 | 120 | 15  | 121 | 95  |
|       | 1               |          |         |         | 99               | 237 | 19  | 148 | 92  |     |
|       | 2               |          |         |         | 153              | 126 | 19  | 104 | 53  |     |
|       |                 |          |         |         | 3                | 427 | 343 | 50  | 321 | 153 |
|       |                 |          |         |         | 4                | 51  | 59  | 5   | 51  | 57  |
|       |                 |          |         |         | 0                | 0   | 1   | 2   | 3   | 4   |
|       | w/ posteriors   | 0.28     | 0.56    | 0.24    | 0                | 183 | 98  | 55  | 78  | 88  |
|       |                 |          |         |         | 1                | 109 | 211 | 34  | 142 | 99  |
|       |                 |          |         |         | 2                | 115 | 85  | 133 | 66  | 56  |
|       |                 |          |         |         | 3                | 340 | 288 | 218 | 268 | 180 |
|       |                 |          |         |         | 4                | 52  | 59  | 16  | 40  | 56  |
|       |                 |          |         |         | 0                | 0   | 1   | 2   | 3   | 4   |
|       | only posteriors | 0.36     | 0.65    | 0.31    | 0                | 169 | 78  | 72  | 78  | 105 |
|       |                 |          |         |         | 1                | 96  | 185 | 55  | 108 | 151 |
|       |                 |          |         |         | 2                | 82  | 54  | 163 | 102 | 54  |
|       |                 |          |         |         | 3                | 210 | 107 | 291 | 504 | 182 |
|       |                 |          |         |         | 4                | 46  | 27  | 16  | 45  | 89  |

Table S2 continued from previous page

| Model | Input Features | Accuracy | AUC-ROC | AUC-PRC | Confusion Matrix |     |     |     |      |      |    |
|-------|----------------|----------|---------|---------|------------------|-----|-----|-----|------|------|----|
|       |                |          |         |         | 0                | 1   | 2   | 3   | 4    |      |    |
| MLP-1 | w/o posteriors | 0.37     | 0.69    | 0.34    | 0                | 41  | 47  | 0   | 465  | 1    |    |
|       |                |          |         |         | 1                | 23  | 81  | 0   | 549  | 0    |    |
|       |                |          |         |         | 2                | 51  | 46  | 0   | 383  | 0    |    |
|       |                |          |         |         | 3                | 156 | 101 | 0   | 1105 | 1    |    |
|       |                |          |         |         | 4                | 20  | 14  | 0   | 196  | 0    |    |
|       |                |          |         |         |                  | 0   | 1   | 2   | 3    | 4    |    |
|       |                |          |         |         |                  | 0   | 29  | 85  | 0    | 440  | 0  |
|       |                |          |         |         |                  | 1   | 15  | 148 | 0    | 490  | 0  |
|       |                |          |         |         |                  | 2   | 37  | 75  | 0    | 368  | 0  |
|       |                |          |         |         |                  | 3   | 99  | 191 | 0    | 1073 | 0  |
|       |                |          |         |         |                  | 4   | 15  | 26  | 0    | 189  | 0  |
|       |                |          |         |         |                  | 0   | 0   | 28  | 0    | 526  | 0  |
|       |                |          |         |         |                  | 1   | 0   | 56  | 0    | 597  | 0  |
|       |                |          |         |         |                  | 2   | 0   | 21  | 0    | 459  | 0  |
|       |                |          |         |         |                  | 3   | 0   | 45  | 0    | 1318 | 0  |
|       |                |          |         |         | 4                | 0   | 17  | 0   | 213  | 0    |    |
| MLP-3 | w/o posteriors | 0.36     | 0.68    | 0.33    | 0                | 77  | 89  | 2   | 359  | 6    |    |
|       |                |          |         |         | 1                | 41  | 169 | 9   | 402  | 9    |    |
|       |                |          |         |         | 2                | 63  | 99  | 2   | 304  | 2    |    |
|       |                |          |         |         | 3                | 211 | 216 | 6   | 887  | 19   |    |
|       |                |          |         |         | 4                | 29  | 28  | 1   | 169  | 1    |    |
|       |                |          |         |         |                  | 0   | 0   | 1   | 2    | 3    | 4  |
|       |                |          |         |         |                  | 0   | 91  | 108 | 2    | 332  | 0  |
|       |                |          |         |         |                  | 1   | 54  | 200 | 2    | 372  | 2  |
|       |                |          |         |         |                  | 2   | 50  | 88  | 19   | 313  | 0  |
|       |                |          |         |         |                  | 3   | 148 | 192 | 14   | 984  | 1  |
|       |                |          |         |         |                  | 4   | 29  | 50  | 2    | 147  | 0  |
|       |                |          |         |         |                  | 0   | 0   | 1   | 2    | 3    | 4  |
|       |                |          |         |         |                  | 0   | 130 | 81  | 12   | 310  | 0  |
|       |                |          |         |         |                  | 1   | 69  | 159 | 12   | 390  | 0  |
|       |                |          |         |         |                  | 2   | 55  | 42  | 30   | 343  | 0  |
|       |                |          |         |         | 3                | 134 | 93  | 38  | 1074 | 0    |    |
|       |                |          |         |         | 4                | 39  | 35  | 0   | 154  | 0    |    |
| MLP-7 | w/o posteriors | 0.34     | 0.66    | 0.3     | 0                | 94  | 75  | 0   | 332  | 1    |    |
|       |                |          |         |         | 1                | 37  | 142 | 0   | 412  | 4    |    |
|       |                |          |         |         | 2                | 88  | 74  | 0   | 293  | 0    |    |
|       |                |          |         |         | 3                | 317 | 175 | 0   | 798  | 4    |    |
|       |                |          |         |         | 4                | 40  | 22  | 0   | 161  | 0    |    |
|       |                |          |         |         |                  | 0   | 0   | 1   | 2    | 3    | 4  |
|       |                |          |         |         |                  | 0   | 74  | 122 | 19   | 278  | 9  |
|       |                |          |         |         |                  | 1   | 46  | 258 | 6    | 284  | 1  |
|       |                |          |         |         |                  | 2   | 48  | 80  | 52   | 275  | 0  |
|       |                |          |         |         |                  | 3   | 158 | 163 | 87   | 870  | 16 |
|       |                |          |         |         |                  | 4   | 32  | 59  | 1    | 128  | 3  |
|       |                |          |         |         |                  | 0   | 0   | 1   | 2    | 3    | 4  |
|       |                |          |         |         |                  | 0   | 74  | 70  | 3    | 355  | 0  |
|       |                |          |         |         |                  | 1   | 43  | 160 | 0    | 392  | 0  |
|       |                |          |         |         |                  | 2   | 26  | 35  | 0    | 394  | 0  |
|       |                |          |         |         | 3                | 56  | 54  | 1   | 1183 | 0    |    |
|       |                |          |         |         | 4                | 12  | 27  | 0   | 184  | 0    |    |



Table S2 continued from previous page

| Model | Input Features  | Accuracy | AUC-ROC | AUC-PRC | Confusion Matrix |     |     |     |     |     |
|-------|-----------------|----------|---------|---------|------------------|-----|-----|-----|-----|-----|
|       |                 |          |         |         | 0                | 1   | 2   | 3   | 4   |     |
| RFC-1 | w/o posteriors  | 0.29     | 0.62    | 0.27    | 0                | 127 | 149 | 41  | 227 | 10  |
|       |                 |          |         |         | 1                | 119 | 220 | 53  | 236 | 25  |
|       |                 |          |         |         | 2                | 113 | 123 | 35  | 195 | 14  |
|       |                 |          |         |         | 3                | 374 | 290 | 96  | 543 | 60  |
|       |                 |          |         |         | 4                | 53  | 55  | 10  | 100 | 12  |
|       | w/ posteriors   | 0.3      | 0.63    | 0.28    | 0                | 126 | 145 | 31  | 245 | 7   |
|       |                 |          |         |         | 1                | 116 | 209 | 51  | 261 | 16  |
|       |                 |          |         |         | 2                | 108 | 112 | 32  | 213 | 15  |
|       |                 |          |         |         | 3                | 364 | 282 | 81  | 592 | 44  |
|       |                 |          |         |         | 4                | 52  | 54  | 11  | 98  | 15  |
|       | only posteriors | 0.19     | 0.57    | 0.23    | 0                | 313 | 98  | 41  | 74  | 28  |
|       |                 |          |         |         | 1                | 331 | 119 | 65  | 85  | 53  |
|       |                 |          |         |         | 2                | 291 | 62  | 24  | 71  | 32  |
|       |                 |          |         |         | 3                | 791 | 244 | 89  | 172 | 67  |
|       |                 |          |         |         | 4                | 120 | 43  | 10  | 46  | 11  |
| RFC-3 | w/o posteriors  | 0.33     | 0.66    | 0.3     | 0                | 156 | 154 | 43  | 158 | 22  |
|       |                 |          |         |         | 1                | 73  | 269 | 35  | 224 | 29  |
|       |                 |          |         |         | 2                | 89  | 126 | 58  | 185 | 12  |
|       |                 |          |         |         | 3                | 304 | 327 | 110 | 554 | 44  |
|       |                 |          |         |         | 4                | 48  | 82  | 7   | 74  | 17  |
|       | w/ posteriors   | 0.44     | 0.74    | 0.44    | 0                | 126 | 133 | 50  | 140 | 84  |
|       |                 |          |         |         | 1                | 72  | 394 | 33  | 86  | 45  |
|       |                 |          |         |         | 2                | 61  | 92  | 86  | 214 | 17  |
|       |                 |          |         |         | 3                | 169 | 212 | 146 | 735 | 77  |
|       |                 |          |         |         | 4                | 37  | 55  | 17  | 52  | 67  |
|       | only posteriors | 0.41     | 0.71    | 0.4     | 0                | 140 | 127 | 63  | 88  | 115 |
|       |                 |          |         |         | 1                | 90  | 351 | 52  | 47  | 90  |
|       |                 |          |         |         | 2                | 67  | 89  | 129 | 147 | 38  |
|       |                 |          |         |         | 3                | 179 | 200 | 242 | 600 | 118 |
|       |                 |          |         |         | 4                | 48  | 38  | 19  | 39  | 84  |
| RFC-7 | w/o posteriors  | 0.35     | 0.67    | 0.33    | 0                | 131 | 134 | 13  | 214 | 10  |
|       |                 |          |         |         | 1                | 58  | 228 | 8   | 288 | 13  |
|       |                 |          |         |         | 2                | 85  | 95  | 27  | 243 | 5   |
|       |                 |          |         |         | 3                | 305 | 250 | 46  | 666 | 27  |
|       |                 |          |         |         | 4                | 55  | 56  | 1   | 101 | 10  |
|       | w/ posteriors   | 0.48     | 0.77    | 0.5     | 0                | 116 | 156 | 18  | 148 | 64  |
|       |                 |          |         |         | 1                | 56  | 402 | 17  | 95  | 25  |
|       |                 |          |         |         | 2                | 50  | 89  | 67  | 232 | 17  |
|       |                 |          |         |         | 3                | 128 | 186 | 91  | 820 | 69  |
|       |                 |          |         |         | 4                | 33  | 59  | 5   | 64  | 62  |
|       | only posteriors | 0.46     | 0.77    | 0.49    | 0                | 107 | 143 | 38  | 125 | 89  |
|       |                 |          |         |         | 1                | 60  | 382 | 26  | 73  | 54  |
|       |                 |          |         |         | 2                | 42  | 91  | 90  | 209 | 23  |
|       |                 |          |         |         | 3                | 116 | 168 | 160 | 756 | 94  |
|       |                 |          |         |         | 4                | 28  | 46  | 6   | 56  | 87  |

Table S2 continued from previous page

| Model           | Input Features | Accuracy | AUC-ROC | AUC-PRC | Confusion Matrix |     |     |     |     |     |
|-----------------|----------------|----------|---------|---------|------------------|-----|-----|-----|-----|-----|
|                 |                |          |         |         | 0                | 1   | 2   | 3   | 4   |     |
| SVC-1           | w/o posteriors | 0.28     | 0.69    | 0.35    | 0                | 179 | 102 | 7   | 251 | 15  |
|                 |                |          |         |         | 1                | 174 | 138 | 23  | 295 | 23  |
|                 |                |          |         |         | 2                | 177 | 76  | 6   | 212 | 9   |
|                 |                |          |         |         | 3                | 505 | 203 | 18  | 600 | 37  |
|                 |                |          |         |         | 4                | 66  | 38  | 10  | 106 | 10  |
|                 |                | 0        | 1       | 2       | 3                | 4   |     |     |     |     |
|                 | w/ posteriors  | 0.28     | 0.69    | 0.35    | 0                | 175 | 98  | 20  | 238 | 23  |
|                 |                |          |         |         | 1                | 187 | 138 | 14  | 274 | 40  |
|                 |                |          |         |         | 2                | 176 | 74  | 6   | 205 | 19  |
|                 |                |          |         |         | 3                | 499 | 198 | 23  | 582 | 61  |
|                 |                |          |         |         | 4                | 68  | 39  | 6   | 105 | 12  |
|                 |                | 0        | 1       | 2       | 3                | 4   |     |     |     |     |
| only posteriors | 0.14           | 0.69     | 0.35    | 0       | 314              | 76  | 0   | 0   | 164 |     |
|                 |                |          |         | 1       | 308              | 55  | 0   | 0   | 290 |     |
|                 |                |          |         | 2       | 292              | 53  | 0   | 0   | 135 |     |
|                 |                |          |         | 3       | 798              | 168 | 0   | 0   | 397 |     |
|                 |                |          |         | 4       | 114              | 36  | 0   | 0   | 80  |     |
|                 | 0              | 1        | 2       | 3       | 4                |     |     |     |     |     |
| SVC-3           | w/o posteriors | 0.28     | 0.69    | 0.35    | 0                | 148 | 125 | 78  | 144 | 38  |
|                 |                |          |         |         | 1                | 96  | 212 | 62  | 194 | 66  |
|                 |                |          |         |         | 2                | 135 | 117 | 49  | 137 | 32  |
|                 |                |          |         |         | 3                | 384 | 297 | 127 | 448 | 83  |
|                 |                |          |         |         | 4                | 44  | 53  | 27  | 73  | 31  |
|                 |                | 0        | 1       | 2       | 3                | 4   |     |     |     |     |
|                 | w/ posteriors  | 0.31     | 0.71    | 0.38    | 0                | 200 | 103 | 54  | 110 | 66  |
|                 |                |          |         |         | 1                | 123 | 207 | 33  | 176 | 91  |
|                 |                |          |         |         | 2                | 104 | 92  | 102 | 123 | 49  |
|                 |                |          |         |         | 3                | 317 | 243 | 175 | 443 | 161 |
|                 |                |          |         |         | 4                | 58  | 52  | 23  | 55  | 40  |
|                 |                | 0        | 1       | 2       | 3                | 4   |     |     |     |     |
| only posteriors | 0.35           | 0.72     | 0.42    | 0       | 192              | 45  | 80  | 125 | 91  |     |
|                 |                |          |         | 1       | 112              | 88  | 60  | 209 | 161 |     |
|                 |                |          |         | 2       | 99               | 31  | 144 | 145 | 51  |     |
|                 |                |          |         | 3       | 237              | 56  | 267 | 632 | 147 |     |
|                 |                |          |         | 4       | 58               | 21  | 17  | 72  | 60  |     |
|                 | 0              | 1        | 2       | 3       | 4                |     |     |     |     |     |
| SVC-7           | w/o posteriors | 0.27     | 0.68    | 0.34    | 0                | 156 | 95  | 45  | 149 | 57  |
|                 |                |          |         |         | 1                | 111 | 187 | 50  | 187 | 60  |
|                 |                |          |         |         | 2                | 161 | 93  | 47  | 124 | 30  |
|                 |                |          |         |         | 3                | 428 | 264 | 105 | 411 | 86  |
|                 |                |          |         |         | 4                | 60  | 47  | 23  | 64  | 29  |
|                 |                | 0        | 1       | 2       | 3                | 4   |     |     |     |     |
|                 | w/ posteriors  | 0.3      | 0.71    | 0.39    | 0                | 176 | 112 | 39  | 100 | 75  |
|                 |                |          |         |         | 1                | 112 | 202 | 22  | 148 | 111 |
|                 |                |          |         |         | 2                | 103 | 86  | 97  | 106 | 63  |
|                 |                |          |         |         | 3                | 280 | 246 | 165 | 392 | 211 |
|                 |                |          |         |         | 4                | 62  | 53  | 11  | 55  | 42  |
|                 |                | 0        | 1       | 2       | 3                | 4   |     |     |     |     |
| only posteriors | 0.36           | 0.75     | 0.45    | 0       | 151              | 102 | 71  | 78  | 100 |     |
|                 |                |          |         | 1       | 83               | 195 | 54  | 131 | 132 |     |
|                 |                |          |         | 2       | 78               | 51  | 158 | 111 | 57  |     |
|                 |                |          |         | 3       | 189              | 129 | 287 | 503 | 186 |     |
|                 |                |          |         | 4       | 37               | 35  | 14  | 52  | 85  |     |

Table S2 continued from previous page

| Model   | Input Features  | Accuracy | AUC-ROC | AUC-PRC | Confusion Matrix |     |     |      |      |    |
|---------|-----------------|----------|---------|---------|------------------|-----|-----|------|------|----|
|         |                 |          |         |         | 0                | 1   | 2   | 3    | 4    |    |
| RNN-30  | w/o posteriors  | 0.4      | 0.69    | 0.35    | 0                | 5   | 53  | 0    | 440  | 0  |
|         |                 |          |         |         | 1                | 12  | 77  | 0    | 530  | 0  |
|         |                 |          |         |         | 2                | 3   | 50  | 0    | 395  | 0  |
|         |                 |          |         |         | 3                | 4   | 114 | 0    | 1122 | 0  |
|         |                 |          |         |         | 4                | 1   | 17  | 0    | 177  | 0  |
|         |                 |          |         |         |                  | 0   | 1   | 2    | 3    | 4  |
|         | w/ posteriors   | 0.36     | 0.67    | 0.31    | 0                | 50  | 93  | 0    | 355  | 0  |
|         |                 |          |         |         | 1                | 11  | 177 | 0    | 431  | 0  |
|         |                 |          |         |         | 2                | 68  | 75  | 0    | 305  | 0  |
|         |                 |          |         |         | 3                | 200 | 195 | 0    | 840  | 5  |
|         |                 |          |         |         | 4                | 28  | 33  | 0    | 131  | 3  |
|         |                 |          |         |         |                  | 0   | 1   | 2    | 3    | 4  |
|         | only posteriors | 0.41     | 0.69    | 0.36    | 0                | 0   | 0   | 0    | 498  | 0  |
|         |                 |          |         |         | 1                | 0   | 0   | 0    | 619  | 0  |
|         |                 |          |         |         | 2                | 0   | 0   | 0    | 448  | 0  |
| 3       |                 |          |         |         | 0                | 0   | 0   | 1240 | 0    |    |
| 4       |                 |          |         |         | 0                | 0   | 0   | 195  | 0    |    |
|         |                 |          |         |         | 0                | 1   | 2   | 3    | 4    |    |
| RNN-91  | w/o posteriors  | 0.35     | 0.67    | 0.31    | 0                | 35  | 87  | 0    | 397  | 15 |
|         |                 |          |         |         | 1                | 14  | 173 | 0    | 434  | 8  |
|         |                 |          |         |         | 2                | 86  | 66  | 0    | 311  | 2  |
|         |                 |          |         |         | 3                | 197 | 171 | 0    | 857  | 59 |
|         |                 |          |         |         | 4                | 14  | 29  | 0    | 156  | 13 |
|         |                 |          |         |         |                  | 0   | 1   | 2    | 3    | 4  |
|         | w/ posteriors   | 0.36     | 0.68    | 0.32    | 0                | 38  | 85  | 0    | 403  | 8  |
|         |                 |          |         |         | 1                | 19  | 172 | 1    | 435  | 2  |
|         |                 |          |         |         | 2                | 60  | 64  | 0    | 340  | 1  |
|         |                 |          |         |         | 3                | 163 | 181 | 0    | 894  | 46 |
|         |                 |          |         |         | 4                | 14  | 24  | 0    | 164  | 10 |
|         |                 |          |         |         |                  | 0   | 1   | 2    | 3    | 4  |
|         | only posteriors | 0.42     | 0.7     | 0.35    | 0                | 5   | 22  | 0    | 507  | 0  |
|         |                 |          |         |         | 1                | 1   | 52  | 0    | 576  | 0  |
|         |                 |          |         |         | 2                | 3   | 10  | 0    | 452  | 0  |
| 3       |                 |          |         |         | 3                | 24  | 0   | 1257 | 0    |    |
| 4       |                 |          |         |         | 0                | 5   | 0   | 207  | 0    |    |
|         |                 |          |         |         | 0                | 1   | 2   | 3    | 4    |    |
| RNN-182 | w/o posteriors  | 0.36     | 0.67    | 0.32    | 0                | 43  | 42  | 0    | 451  | 0  |
|         |                 |          |         |         | 1                | 36  | 74  | 0    | 518  | 1  |
|         |                 |          |         |         | 2                | 33  | 48  | 0    | 385  | 1  |
|         |                 |          |         |         | 3                | 154 | 120 | 0    | 1035 | 0  |
|         |                 |          |         |         | 4                | 23  | 17  | 0    | 182  | 0  |
|         |                 |          |         |         |                  | 0   | 1   | 2    | 3    | 4  |
|         | w/ posteriors   | 0.39     | 0.67    | 0.33    | 0                | 35  | 54  | 3    | 444  | 0  |
|         |                 |          |         |         | 1                | 17  | 114 | 8    | 489  | 1  |
|         |                 |          |         |         | 2                | 32  | 53  | 0    | 382  | 0  |
|         |                 |          |         |         | 3                | 111 | 124 | 0    | 1074 | 0  |
|         |                 |          |         |         | 4                | 17  | 16  | 0    | 189  | 0  |
|         |                 |          |         |         |                  | 0   | 1   | 2    | 3    | 4  |
|         | only posteriors | 0.42     | 0.69    | 0.35    | 0                | 0   | 22  | 0    | 514  | 0  |
|         |                 |          |         |         | 1                | 0   | 53  | 0    | 576  | 0  |
|         |                 |          |         |         | 2                | 0   | 10  | 0    | 457  | 0  |
| 3       |                 |          |         |         | 0                | 25  | 0   | 1284 | 0    |    |
| 4       |                 |          |         |         | 0                | 3   | 0   | 219  | 0    |    |

Table S2 continued from previous page

| Model    | Input Features  | Accuracy | AUC-ROC | AUC-PRC | Confusion Matrix |     |     |      |      |    |
|----------|-----------------|----------|---------|---------|------------------|-----|-----|------|------|----|
|          |                 |          |         |         | 0                | 1   | 2   | 3    | 4    |    |
| LSTM-30  | w/o posteriors  | 0.33     | 0.67    | 0.3     | 0                | 59  | 75  | 0    | 361  | 3  |
|          |                 |          |         |         | 1                | 55  | 136 | 0    | 426  | 2  |
|          |                 |          |         |         | 2                | 82  | 69  | 0    | 296  | 1  |
|          |                 |          |         |         | 3                | 257 | 184 | 0    | 780  | 19 |
|          |                 |          |         |         | 4                | 30  | 32  | 0    | 131  | 2  |
|          |                 | 0        | 1       | 2       | 3                | 4   |     |      |      |    |
|          |                 | 0        | 50      | 84      | 0                | 362 | 2   |      |      |    |
|          | w/ posteriors   | 0.36     | 0.67    | 0.32    | 1                | 39  | 154 | 0    | 424  | 2  |
|          |                 |          |         |         | 2                | 69  | 62  | 0    | 317  | 0  |
|          |                 |          |         |         | 3                | 211 | 162 | 0    | 861  | 6  |
|          |                 |          |         |         | 4                | 28  | 32  | 0    | 134  | 1  |
|          |                 |          |         |         |                  | 0   | 1   | 2    | 3    | 4  |
|          |                 | 0        | 0       | 4       | 0                | 494 | 0   |      |      |    |
|          | only posteriors | 0.42     | 0.69    | 0.37    | 1                | 0   | 31  | 0    | 588  | 0  |
|          |                 |          |         |         | 2                | 0   | 1   | 0    | 447  | 0  |
| 3        |                 |          |         |         | 0                | 10  | 0   | 1230 | 0    |    |
| 4        |                 |          |         |         | 0                | 1   | 0   | 194  | 0    |    |
|          |                 |          |         |         | 0                | 1   | 2   | 3    | 4    |    |
| LSTM-91  | w/o posteriors  | 0.33     | 0.68    | 0.32    | 0                | 50  | 67  | 0    | 415  | 2  |
|          |                 |          |         |         | 1                | 38  | 126 | 0    | 459  | 6  |
|          |                 |          |         |         | 2                | 71  | 52  | 0    | 341  | 1  |
|          |                 |          |         |         | 3                | 242 | 171 | 0    | 868  | 3  |
|          |                 |          |         |         | 4                | 29  | 27  | 0    | 156  | 0  |
|          |                 | 0        | 1       | 2       | 3                | 4   |     |      |      |    |
|          |                 | 0        | 62      | 80      | 0                | 389 | 3   |      |      |    |
|          | w/ posteriors   | 0.33     | 0.67    | 0.32    | 1                | 51  | 174 | 0    | 400  | 4  |
|          |                 |          |         |         | 2                | 85  | 67  | 0    | 312  | 1  |
|          |                 |          |         |         | 3                | 265 | 217 | 0    | 790  | 12 |
|          |                 |          |         |         | 4                | 28  | 27  | 0    | 156  | 1  |
|          |                 |          |         |         |                  | 0   | 1   | 2    | 3    | 4  |
|          |                 | 0        | 0       | 5       | 0                | 529 | 0   |      |      |    |
|          | only posteriors | 0.41     | 0.69    | 0.35    | 1                | 0   | 9   | 0    | 620  | 0  |
|          |                 |          |         |         | 2                | 0   | 0   | 0    | 465  | 0  |
| 3        |                 |          |         |         | 0                | 2   | 0   | 1282 | 0    |    |
| 4        |                 |          |         |         | 0                | 0   | 0   | 212  | 0    |    |
|          |                 |          |         |         | 0                | 1   | 2   | 3    | 4    |    |
| LSTM-182 | w/o posteriors  | 0.35     | 0.65    | 0.3     | 0                | 50  | 80  | 0    | 399  | 7  |
|          |                 |          |         |         | 1                | 23  | 149 | 3    | 443  | 11 |
|          |                 |          |         |         | 2                | 46  | 70  | 0    | 347  | 4  |
|          |                 |          |         |         | 3                | 177 | 197 | 0    | 905  | 30 |
|          |                 |          |         |         | 4                | 27  | 26  | 1    | 163  | 5  |
|          |                 | 0        | 1       | 2       | 3                | 4   |     |      |      |    |
|          |                 | 0        | 50      | 19      | 0                | 467 | 0   |      |      |    |
|          | w/ posteriors   | 0.36     | 0.68    | 0.33    | 1                | 43  | 59  | 0    | 527  | 0  |
|          |                 |          |         |         | 2                | 36  | 26  | 0    | 405  | 0  |
|          |                 |          |         |         | 3                | 182 | 90  | 0    | 1037 | 0  |
|          |                 |          |         |         | 4                | 28  | 6   | 0    | 188  | 0  |
|          |                 |          |         |         |                  | 0   | 1   | 2    | 3    | 4  |
|          |                 | 0        | 0       | 22      | 0                | 514 | 0   |      |      |    |
|          | only posteriors | 0.42     | 0.69    | 0.37    | 1                | 0   | 51  | 0    | 578  | 0  |
|          |                 |          |         |         | 2                | 0   | 12  | 0    | 455  | 0  |
| 3        |                 |          |         |         | 0                | 19  | 0   | 1290 | 0    |    |
| 4        |                 |          |         |         | 0                | 8   | 0   | 214  | 0    |    |
|          |                 |          |         |         | 0                | 1   | 2   | 3    | 4    |    |

Table S2 continued from previous page

| Model           | Input Features | Accuracy | AUC-ROC | AUC-PRC | Confusion Matrix |     |     |      |     |    |
|-----------------|----------------|----------|---------|---------|------------------|-----|-----|------|-----|----|
|                 |                |          |         |         | 0                | 1   | 2   | 3    | 4   |    |
| GRU-30          | w/o posteriors | 0.34     | 0.67    | 0.31    | 0                | 54  | 92  | 0    | 349 | 3  |
|                 |                |          |         |         | 1                | 32  | 156 | 0    | 428 | 3  |
|                 |                |          |         |         | 2                | 70  | 79  | 0    | 297 | 2  |
|                 |                |          |         |         | 3                | 211 | 213 | 0    | 793 | 23 |
|                 |                |          |         |         | 4                | 29  | 39  | 0    | 123 | 4  |
|                 |                | 0        | 1       | 2       | 3                | 4   |     |      |     |    |
|                 | w/ posteriors  | 0.34     | 0.67    | 0.31    | 0                | 44  | 93  | 4    | 350 | 7  |
|                 |                |          |         |         | 1                | 18  | 175 | 1    | 418 | 7  |
|                 |                |          |         |         | 2                | 74  | 69  | 0    | 300 | 5  |
|                 |                |          |         |         | 3                | 201 | 187 | 1    | 810 | 41 |
|                 |                |          |         |         | 4                | 29  | 37  | 0    | 124 | 5  |
|                 |                | 0        | 1       | 2       | 3                | 4   |     |      |     |    |
| only posteriors | 0.42           | 0.69     | 0.36    | 0       | 0                | 22  | 0   | 476  | 0   |    |
|                 |                |          |         | 1       | 0                | 59  | 0   | 560  | 0   |    |
|                 |                |          |         | 2       | 0                | 13  | 0   | 434  | 1   |    |
|                 |                |          |         | 3       | 0                | 29  | 0   | 1211 | 0   |    |
|                 |                |          |         | 4       | 0                | 8   | 0   | 187  | 0   |    |
|                 | 0              | 1        | 2       | 3       | 4                |     |     |      |     |    |
| GRU-91          | w/o posteriors | 0.33     | 0.67    | 0.32    | 0                | 74  | 63  | 0    | 396 | 1  |
|                 |                |          |         |         | 1                | 60  | 107 | 0    | 459 | 3  |
|                 |                |          |         |         | 2                | 87  | 54  | 0    | 324 | 0  |
|                 |                |          |         |         | 3                | 279 | 152 | 0    | 851 | 2  |
|                 |                |          |         |         | 4                | 31  | 23  | 0    | 158 | 0  |
|                 |                | 0        | 1       | 2       | 3                | 4   |     |      |     |    |
|                 | w/ posteriors  | 0.34     | 0.67    | 0.32    | 0                | 56  | 73  | 0    | 399 | 6  |
|                 |                |          |         |         | 1                | 35  | 184 | 0    | 408 | 2  |
|                 |                |          |         |         | 2                | 75  | 55  | 0    | 330 | 5  |
|                 |                |          |         |         | 3                | 253 | 182 | 0    | 819 | 30 |
|                 |                |          |         |         | 4                | 29  | 26  | 0    | 152 | 5  |
|                 |                | 0        | 1       | 2       | 3                | 4   |     |      |     |    |
| only posteriors | 0.41           | 0.69     | 0.35    | 0       | 6                | 1   | 0   | 527  | 0   |    |
|                 |                |          |         | 1       | 9                | 2   | 0   | 618  | 0   |    |
|                 |                |          |         | 2       | 5                | 0   | 0   | 460  | 0   |    |
|                 |                |          |         | 3       | 8                | 1   | 0   | 1275 | 0   |    |
|                 |                |          |         | 4       | 1                | 0   | 0   | 211  | 0   |    |
|                 | 0              | 1        | 2       | 3       | 4                |     |     |      |     |    |
| GRU-182         | w/o posteriors | 0.33     | 0.65    | 0.29    | 0                | 57  | 70  | 0    | 406 | 3  |
|                 |                |          |         |         | 1                | 40  | 138 | 0    | 451 | 0  |
|                 |                |          |         |         | 2                | 77  | 60  | 0    | 326 | 4  |
|                 |                |          |         |         | 3                | 243 | 174 | 0    | 856 | 36 |
|                 |                |          |         |         | 4                | 24  | 25  | 0    | 172 | 1  |
|                 |                | 0        | 1       | 2       | 3                | 4   |     |      |     |    |
|                 | w/ posteriors  | 0.36     | 0.67    | 0.33    | 0                | 56  | 36  | 0    | 444 | 0  |
|                 |                |          |         |         | 1                | 50  | 96  | 0    | 483 | 0  |
|                 |                |          |         |         | 2                | 41  | 42  | 0    | 384 | 0  |
|                 |                |          |         |         | 3                | 211 | 117 | 0    | 975 | 6  |
|                 |                |          |         |         | 4                | 28  | 8   | 0    | 186 | 0  |
|                 |                | 0        | 1       | 2       | 3                | 4   |     |      |     |    |
| only posteriors | 0.41           | 0.68     | 0.35    | 0       | 0                | 0   | 0   | 536  | 0   |    |
|                 |                |          |         | 1       | 0                | 0   | 0   | 629  | 0   |    |
|                 |                |          |         | 2       | 0                | 0   | 0   | 467  | 0   |    |
|                 |                |          |         | 3       | 0                | 0   | 0   | 1309 | 0   |    |
|                 |                |          |         | 4       | 0                | 0   | 0   | 222  | 0   |    |
